# Supplementary material for: The chemistry of parent phosphiranide in the coordination sphere of tungsten
Source: Royal Society of Chemistry journal article supplement (doi:10.1039/c6dt00964f), 2016-01-01
Supplement: c6dt00964f1.pdf [file c6dt00964f1.pdf]

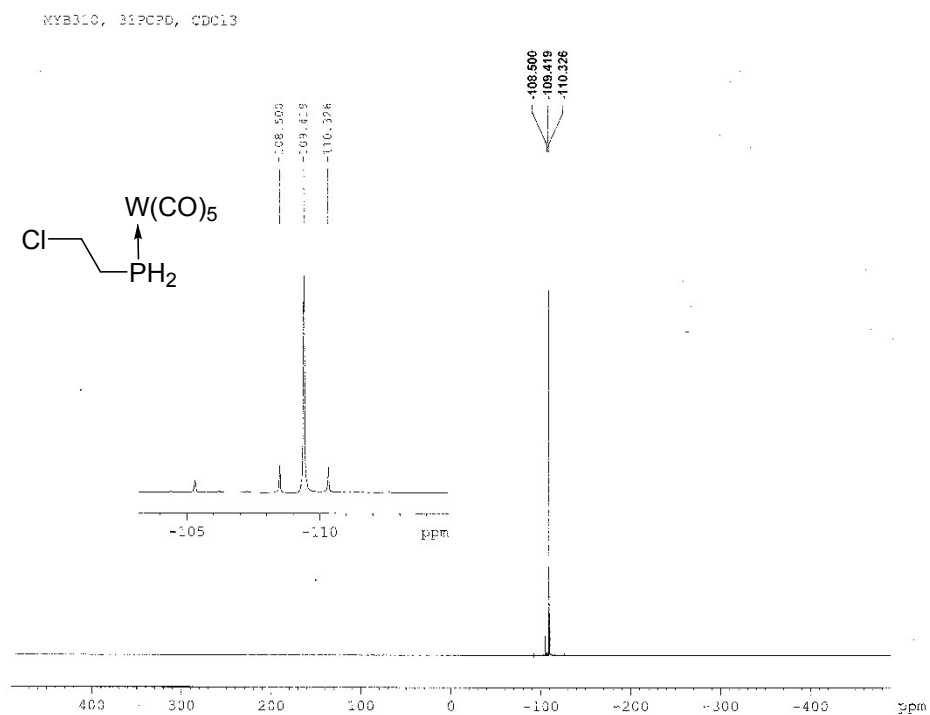

**<sup>31</sup>P NMR of Compound 1**

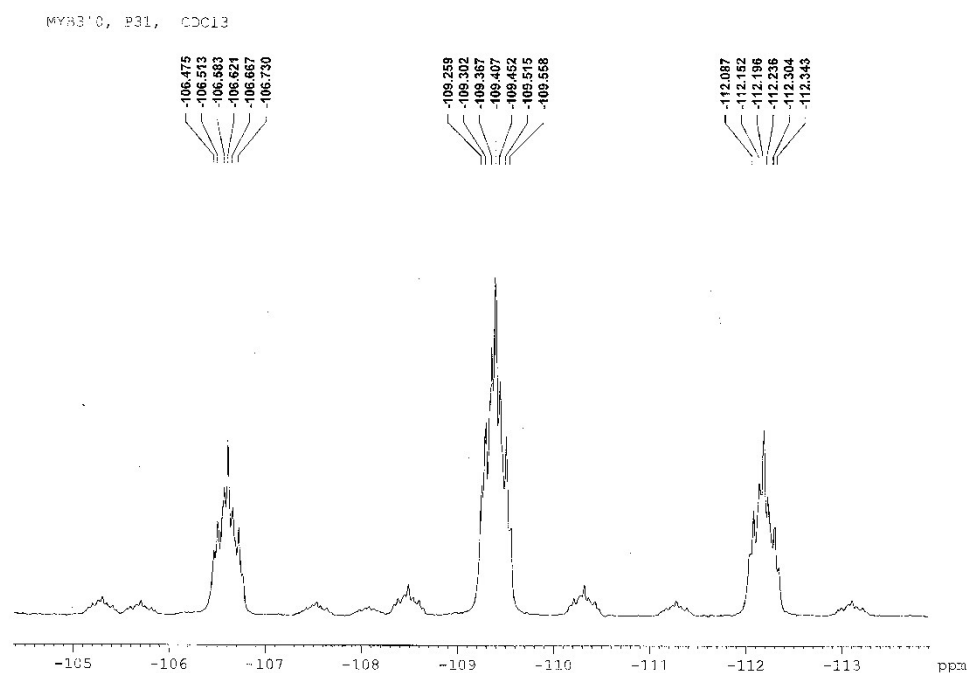

**<sup>31</sup>P NMR of Compound 1**

MYB-310 PROTON/CDC13

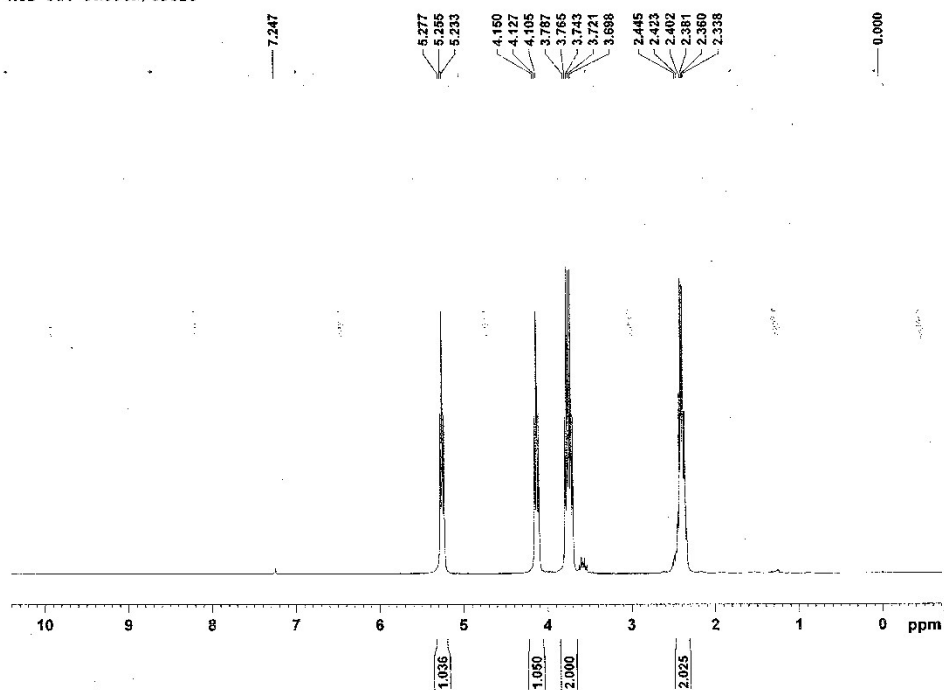

$^1\text{H}$  NMR of Compound 1

MYB310, CDCl3, CDCl3

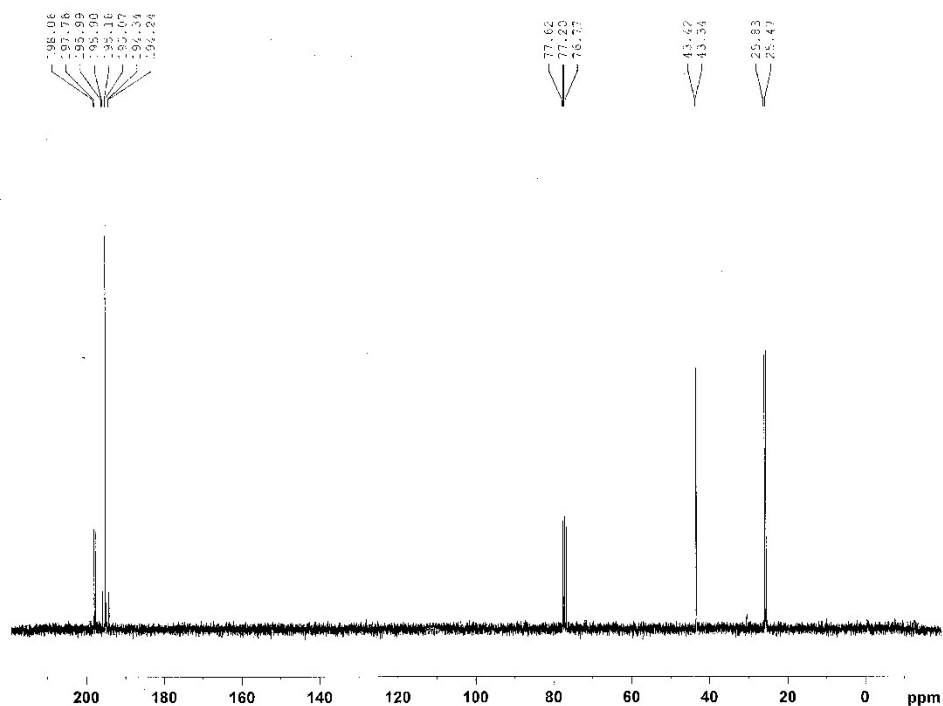

$^{13}\text{C}\{^1\text{H}\}$  NMR of Compound 1

MYB341,  $^{31}\text{P}$ CPD, THF

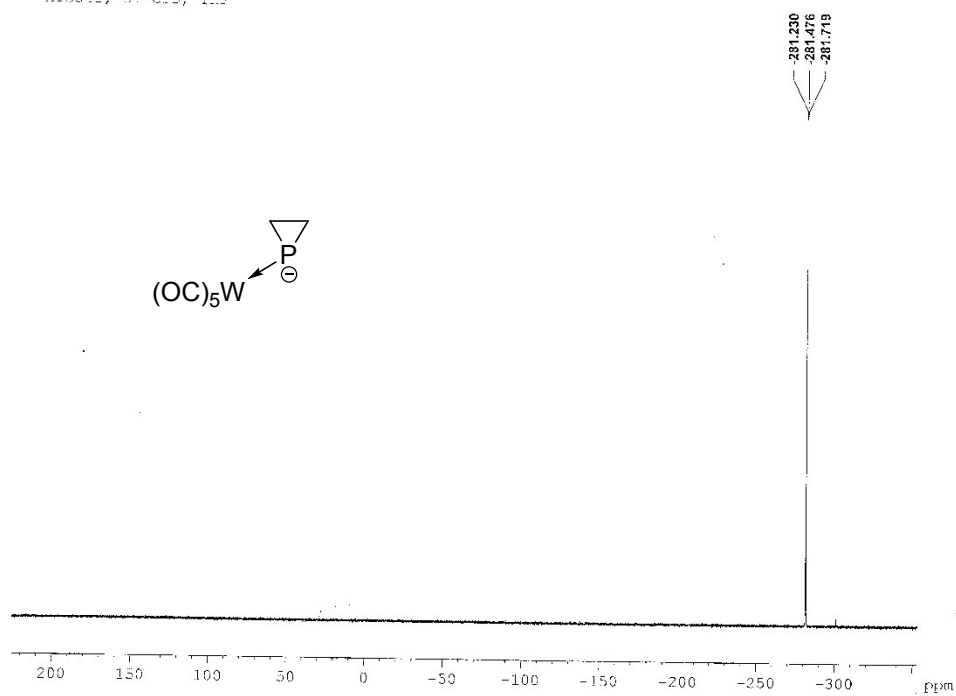

$^{31}\text{P}$  NMR of Compound 2

MYB341, THF, P31

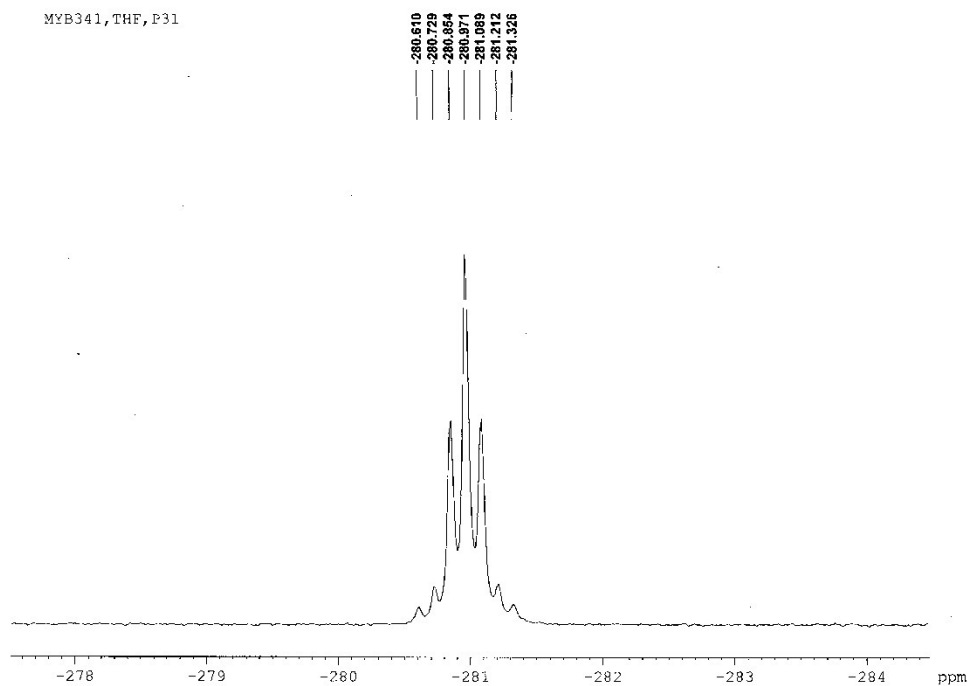

$^{31}\text{P}$  NMR of Compound 2

MYB-341 PROTON/CDC13

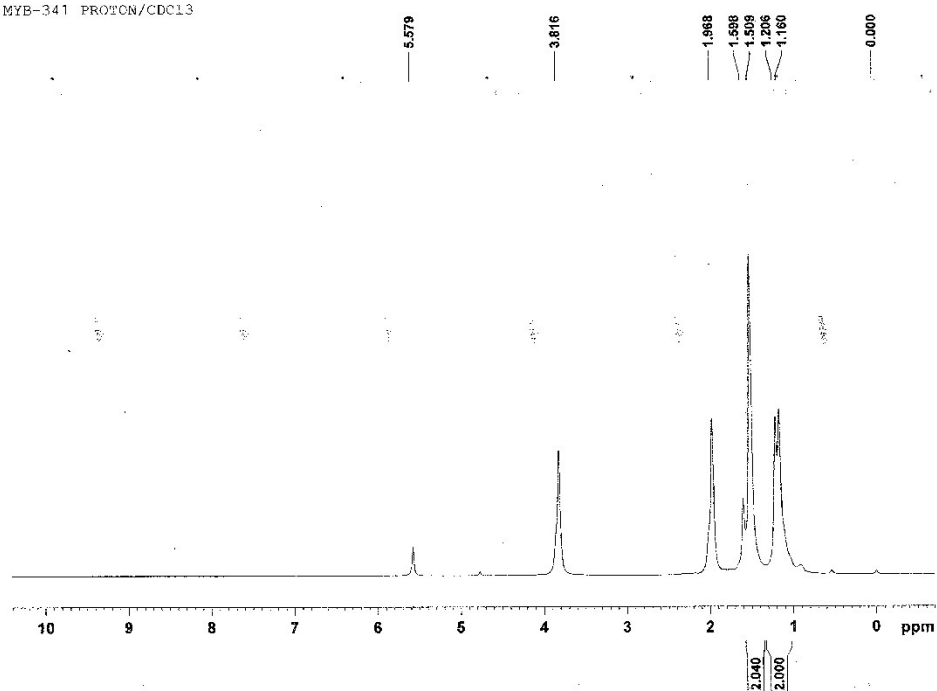

### <sup>1</sup>H NMR of Compound 2

MYB341, C13C5D, TMS

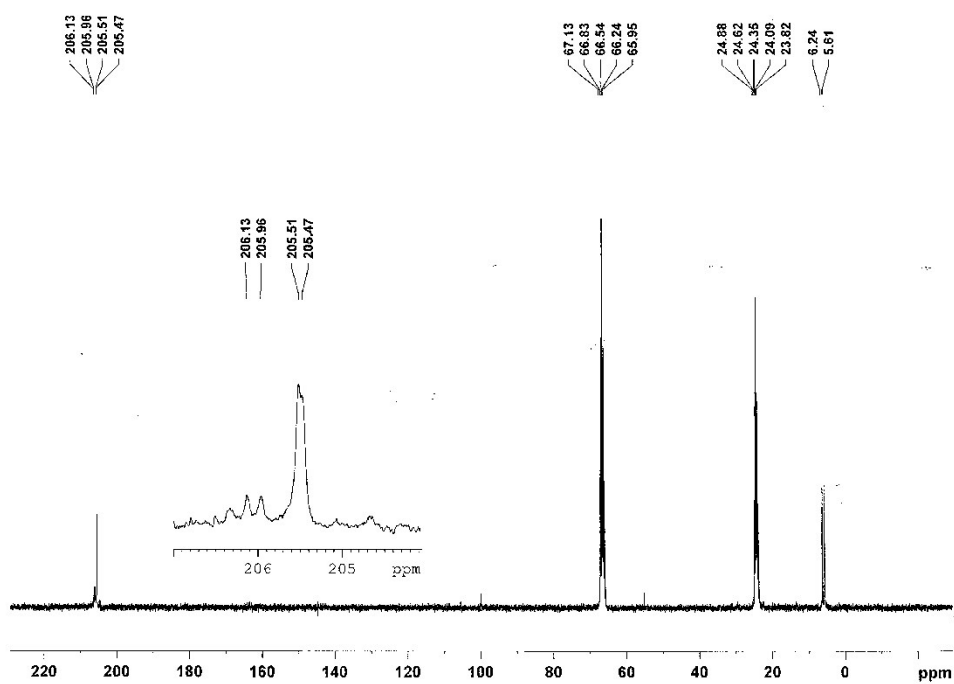

### <sup>13</sup>C{<sup>1</sup>H} NMR of Compound 2

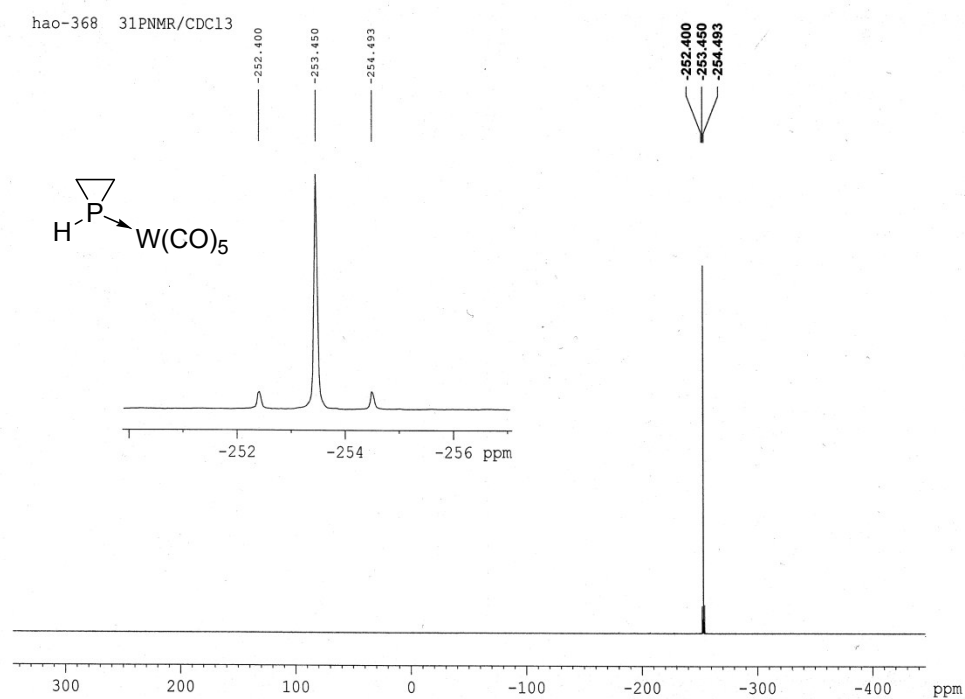

**<sup>31</sup>P NMR of Compound 3**

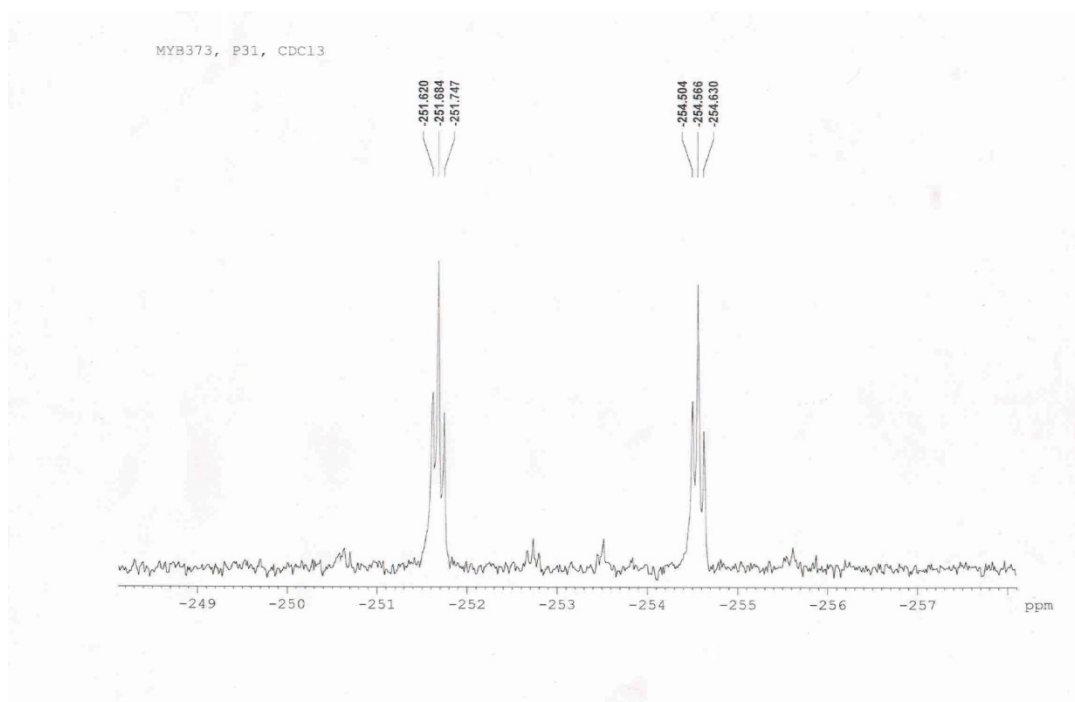

**<sup>31</sup>P NMR of Compound 3**

hao-368 <sup>1</sup>H NMR/CDC13

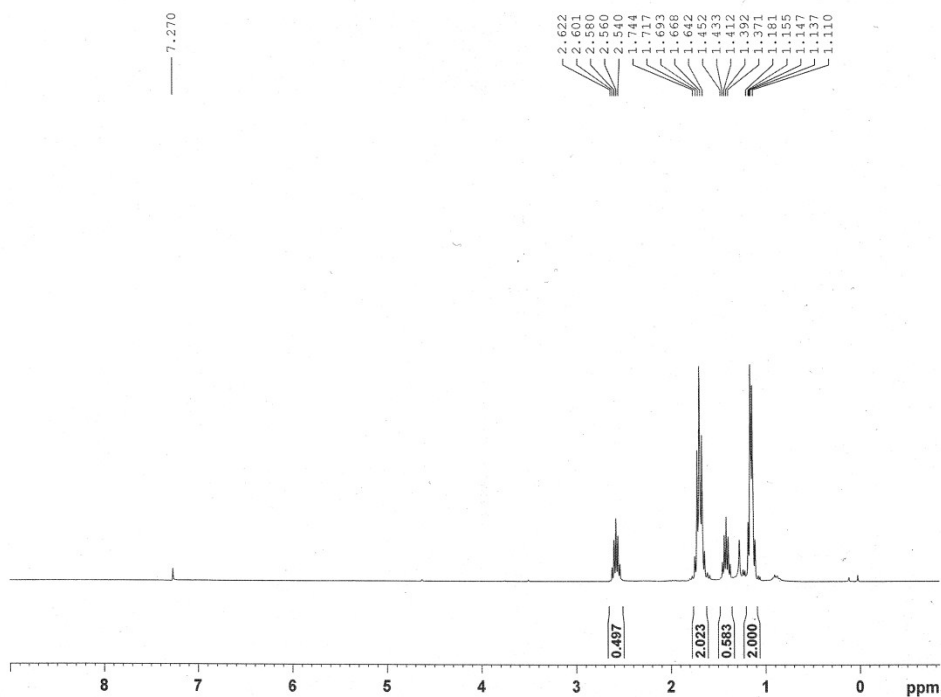

**<sup>1</sup>H NMR of Compound 3**

hao-368 <sup>13</sup>C NMR/CDC13

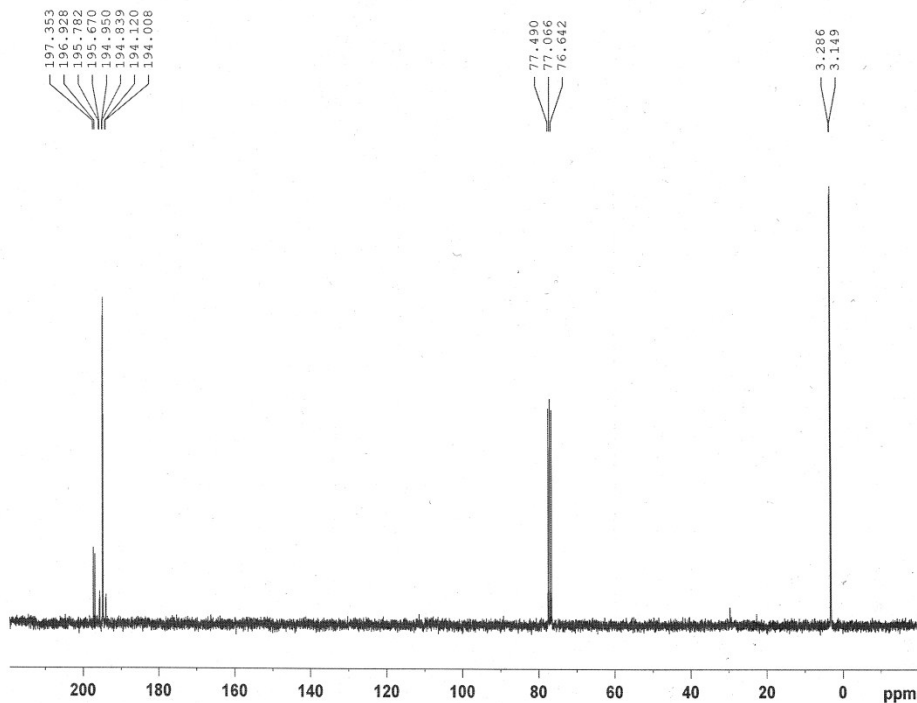

**<sup>13</sup>C{<sup>1</sup>H} NMR of Compound 3**

$$\begin{array}{r} 3.288 \\ 3.149 \\ \hline \end{array}$$
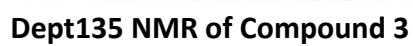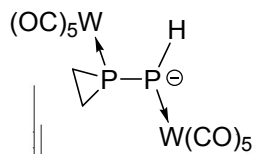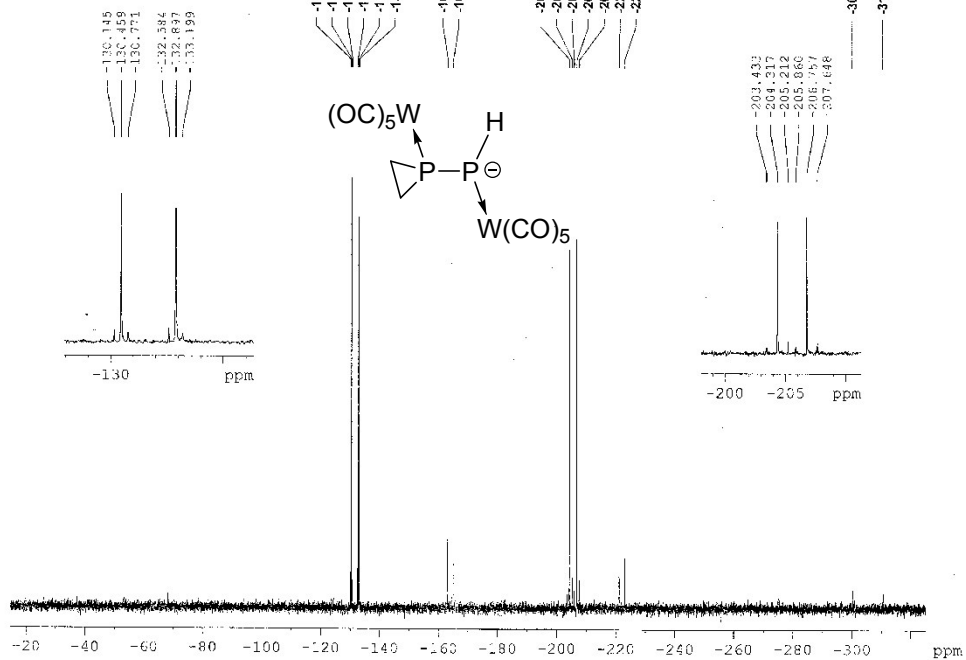

### <sup>31</sup>P NMR of Compound 4





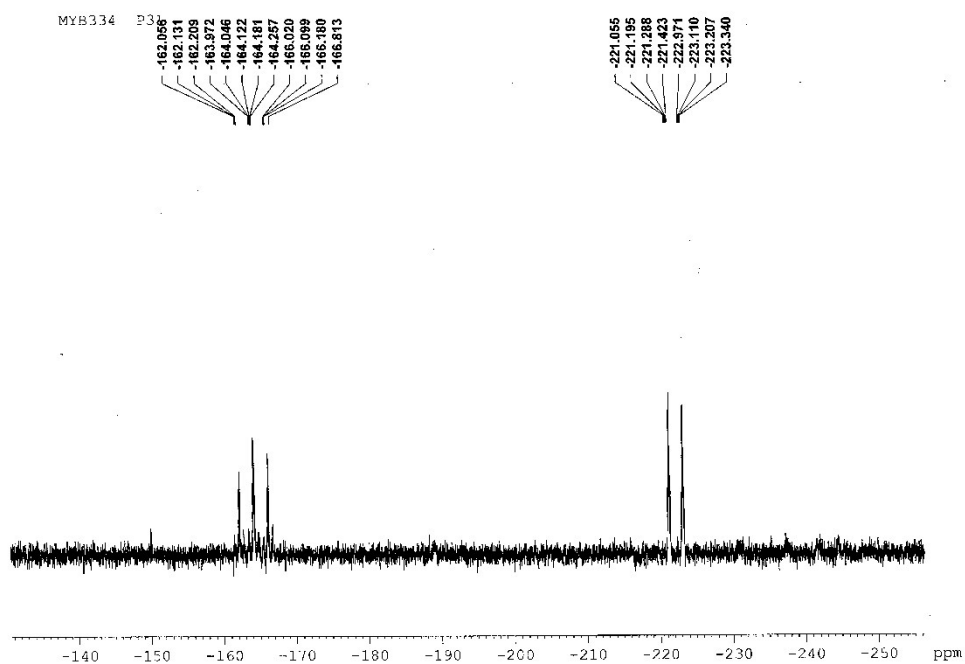

**$^{31}\text{P}$  NMR of Compound 5**

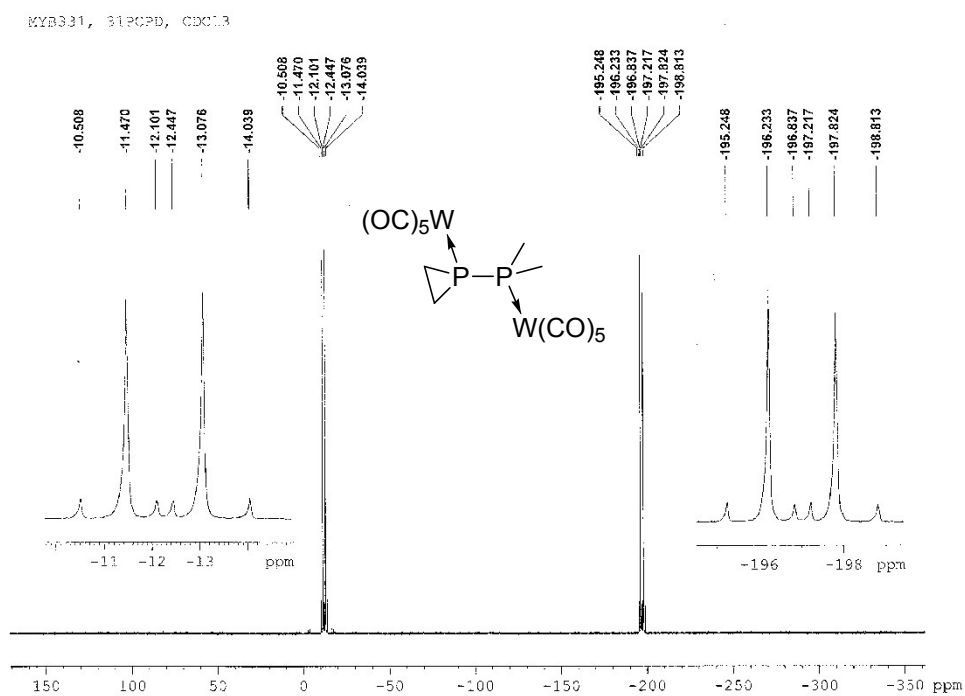

**$^{31}\text{P}$  NMR of Compound 6**

MYB-331 PROTON/CDC13

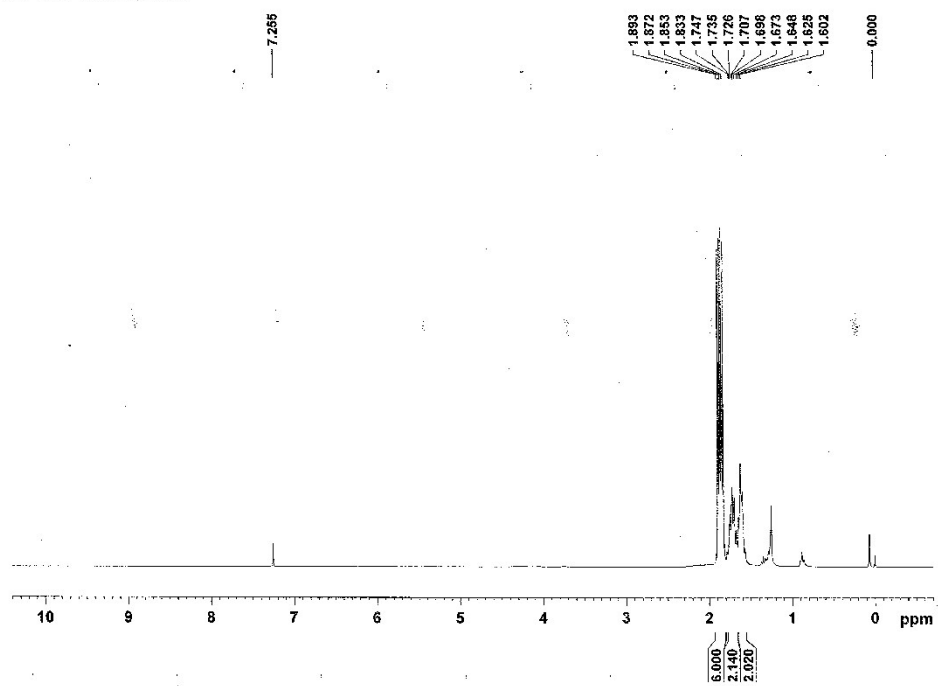

**$^1\text{H}$  NMR of Compound 6**

MYB331, CDCl3, CDCl3

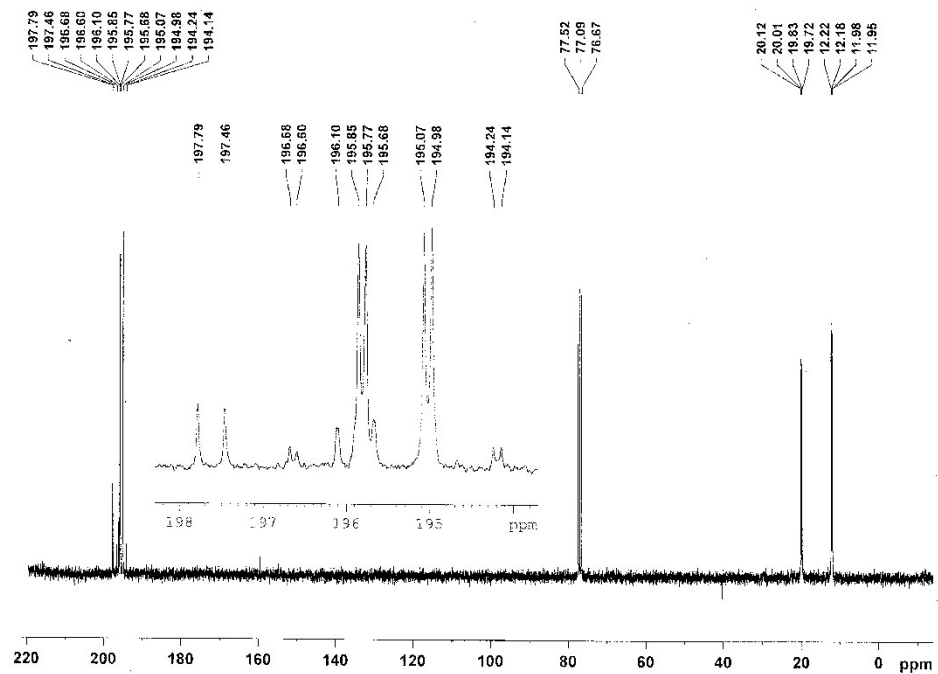

**$^{13}\text{C}\{^1\text{H}\}$  NMR of Compound 6**

MYB331, C13DEPT135, CDCl3

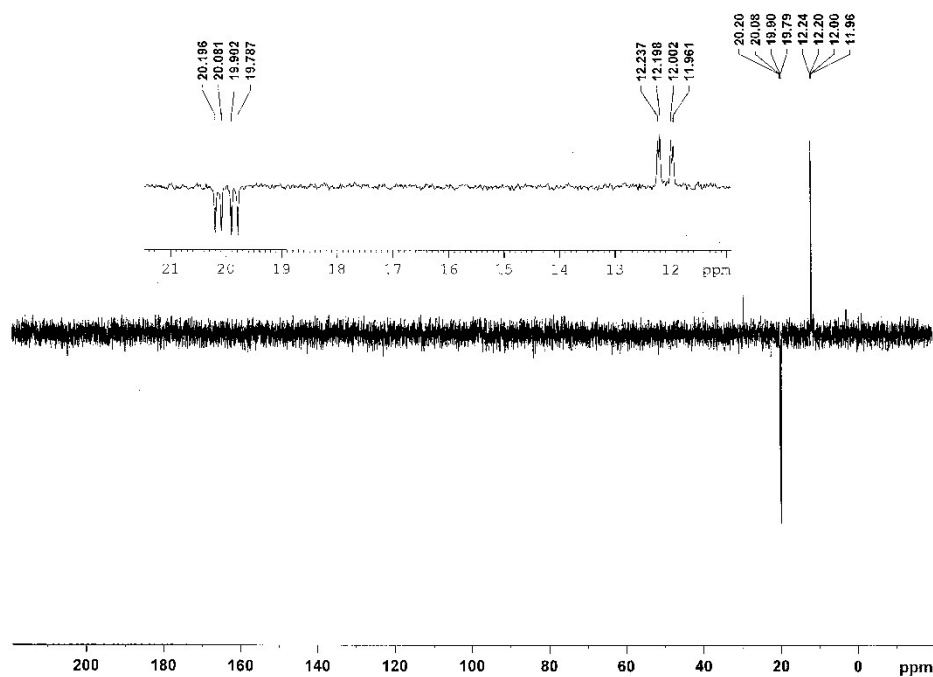

Dept135 NMR of Compound 6

MYB327, DMSO, 31P NMR

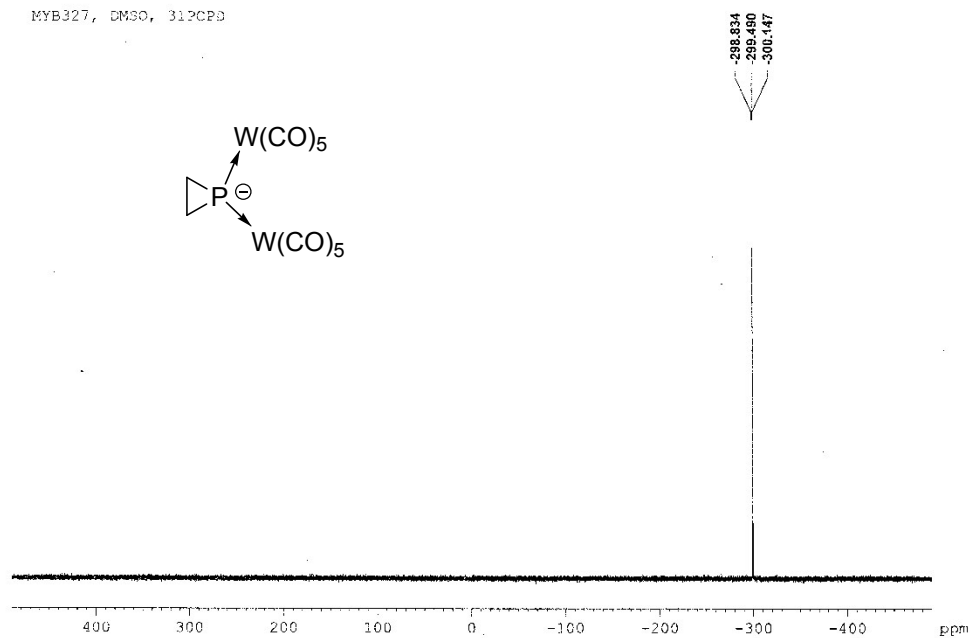

<sup>31</sup>P NMR of Compound 7

MYB315, P31, in ethyl acetate

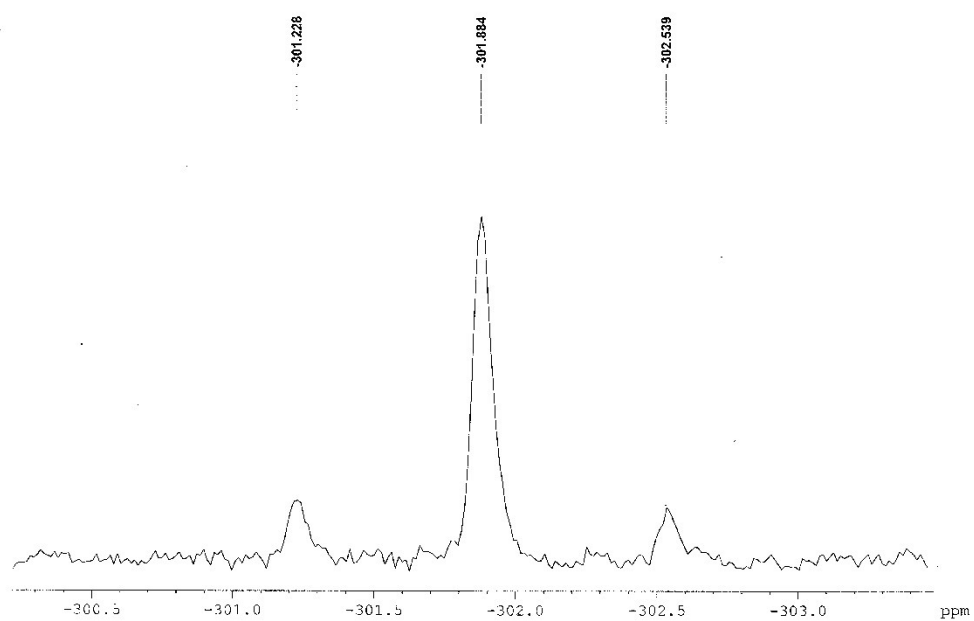

### $^{31}\text{P}$ NMR of Compound 7

MYB-327 PROTON/ $\text{CDCl}_3$

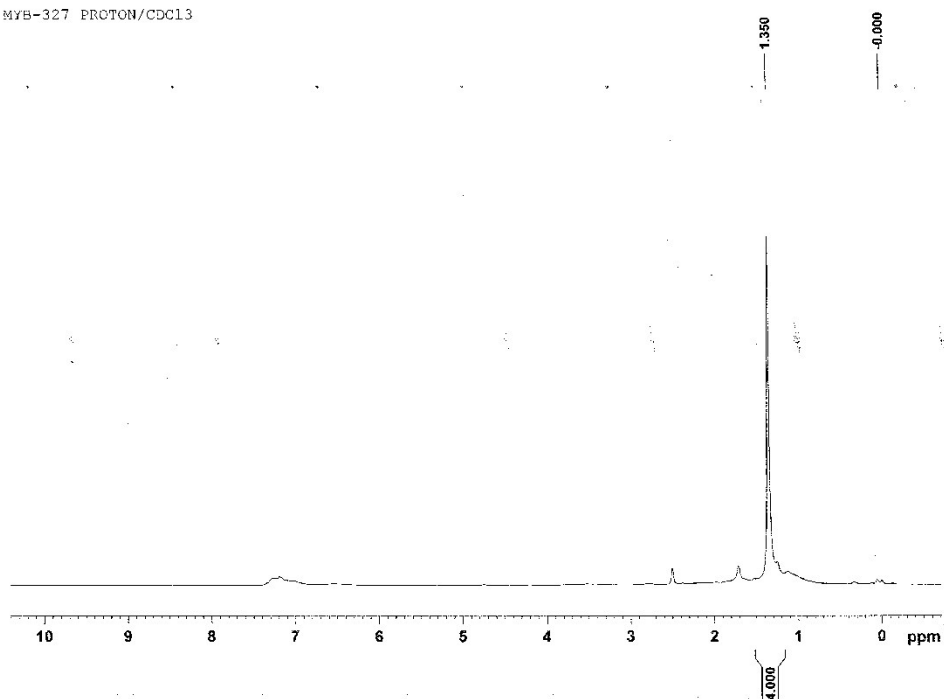

### $^1\text{H}$ NMR of Compound 7

MYB327, DMSO, C13CPD

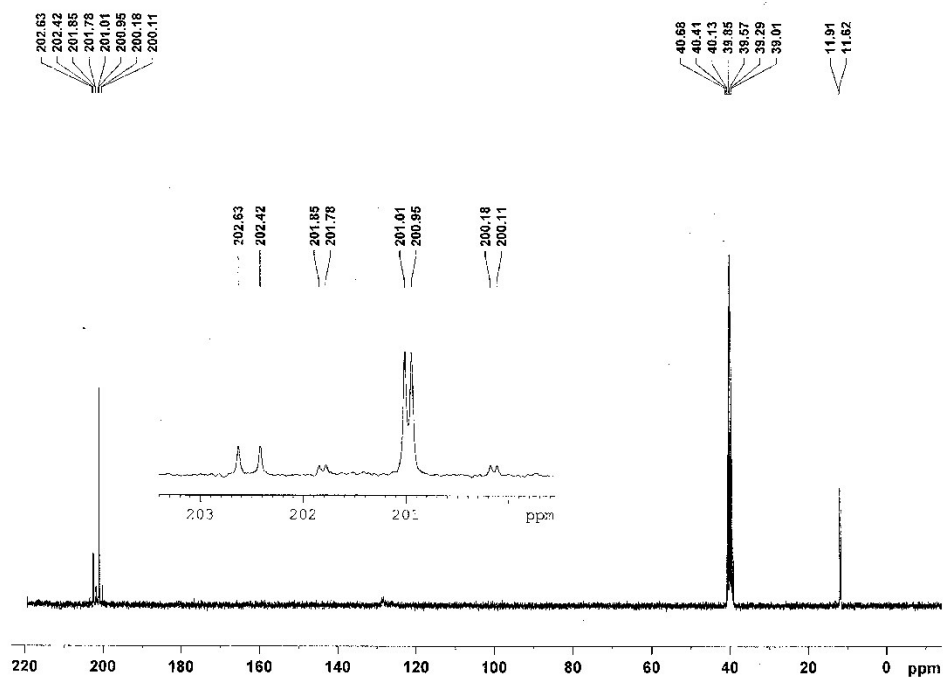

$^{13}\text{C}\{^1\text{H}\}$  NMR of Compound 7

MYB341, 31PCPD, THF

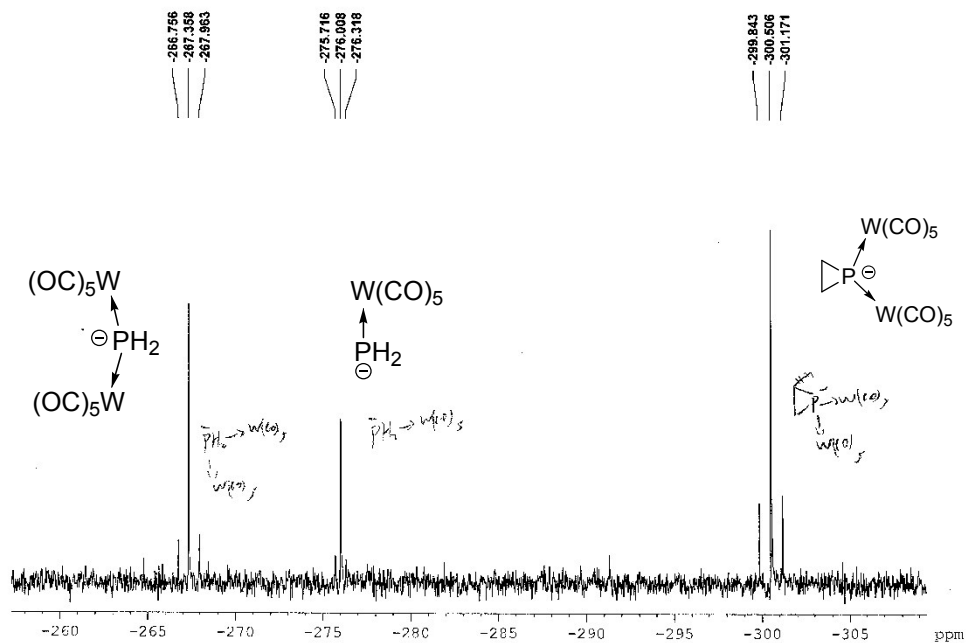

$^{31}\text{P}$  NMR of Compound 7, 8

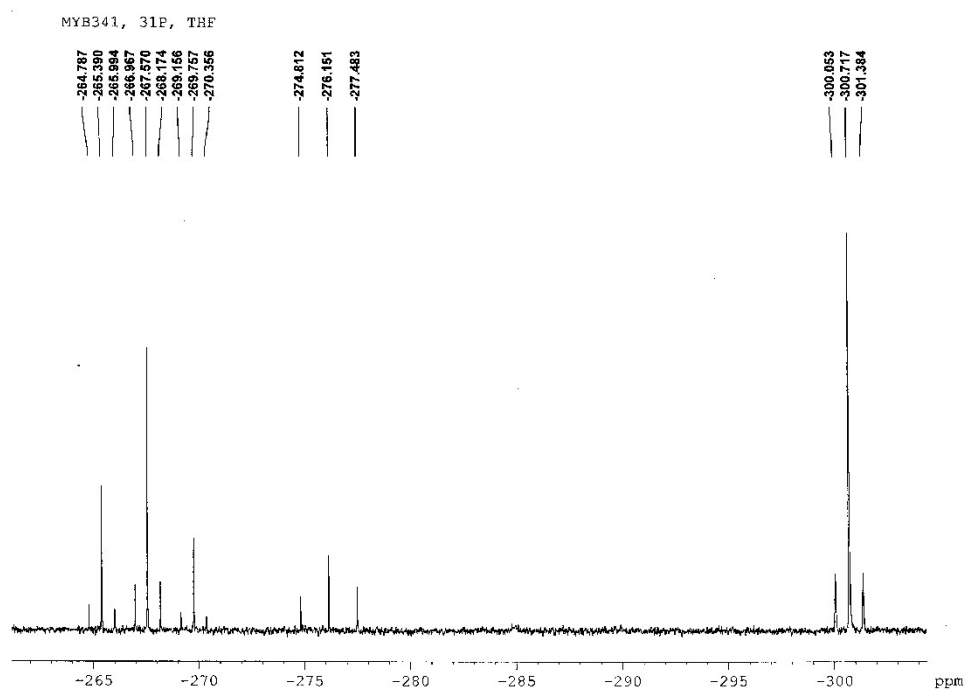

**$^{31}\text{P}$  NMR of Compound 7, 8**

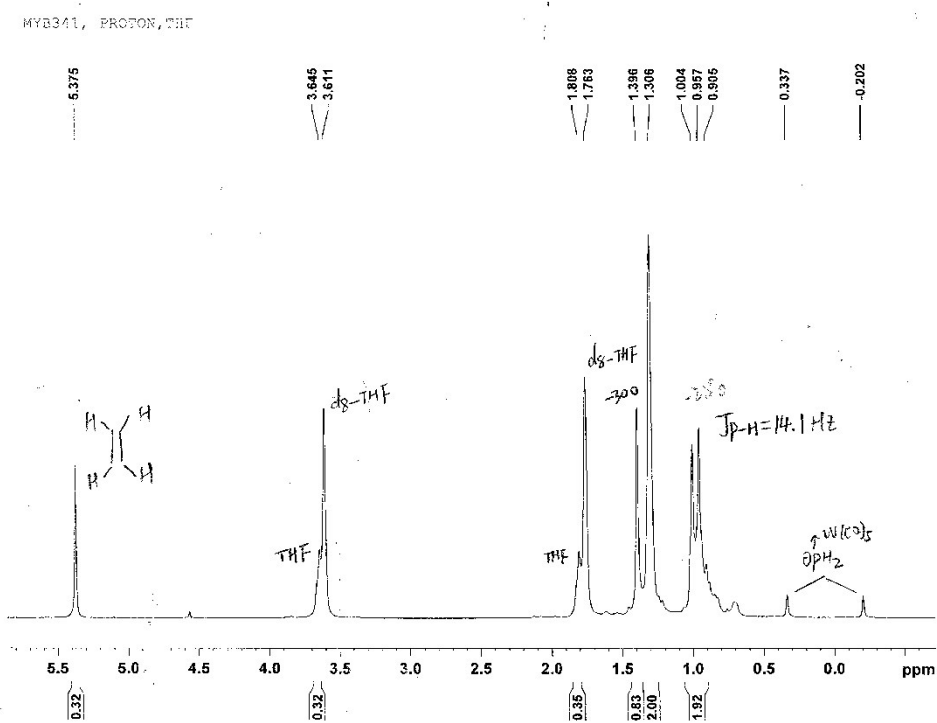

**$^1\text{H}$  NMR of Compound 7, 8**

MYB341, CDCl<sub>3</sub>, TMS

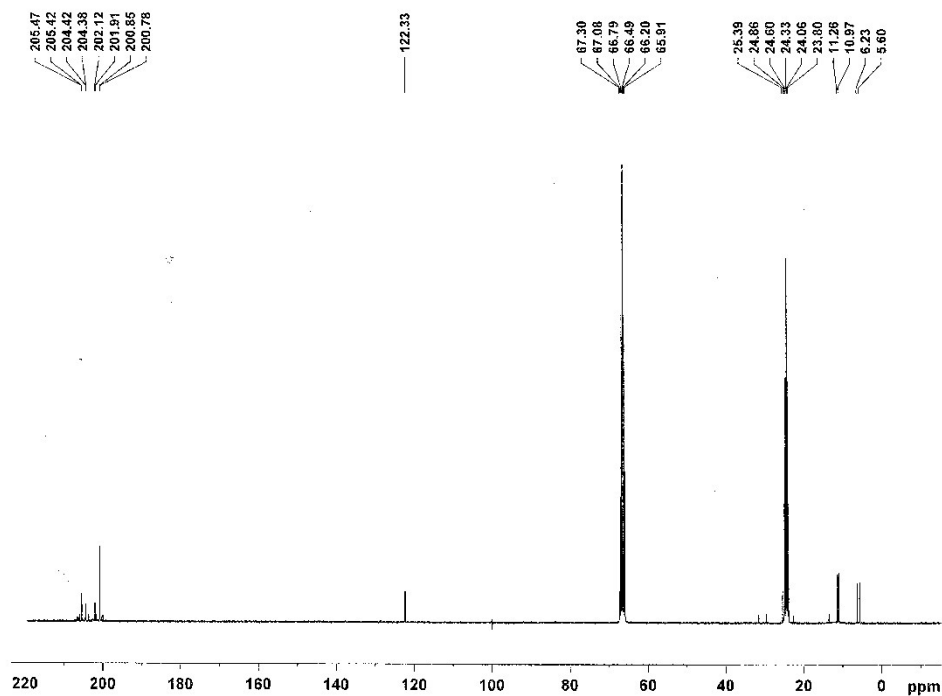

<sup>13</sup>C{<sup>1</sup>H} NMR of Compound 7, 8

9a0-347 <sup>31</sup>P NMR/CDCl<sub>3</sub>

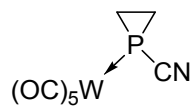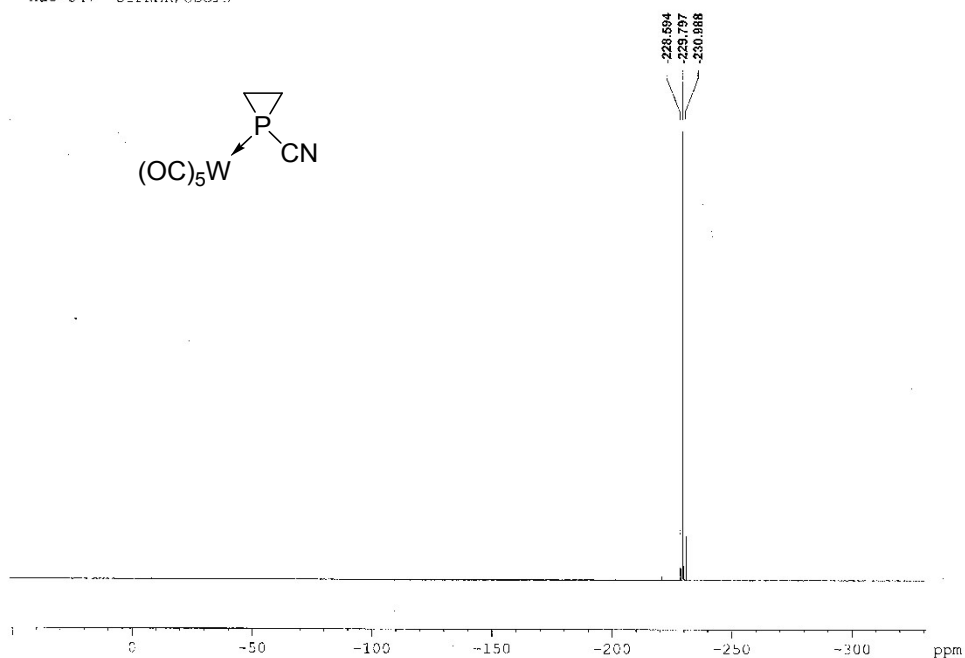

<sup>31</sup>P NMR of Compound 9a

hao-347 <sup>1</sup>H NMR/CDC13

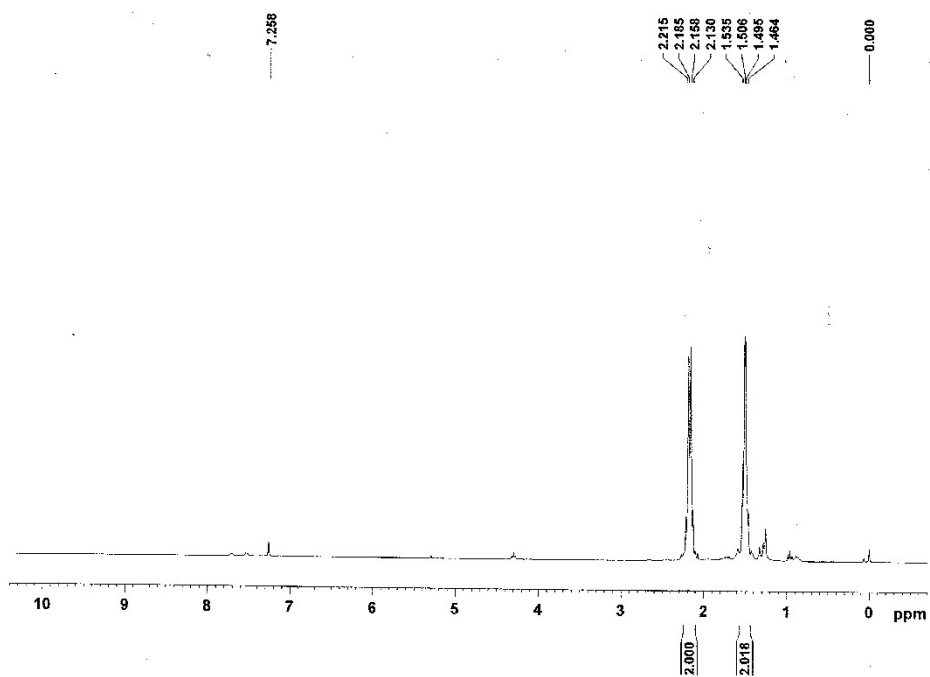

<sup>1</sup>H NMR of Compound 9a

hao-347 <sup>13</sup>C NMR/CDC13

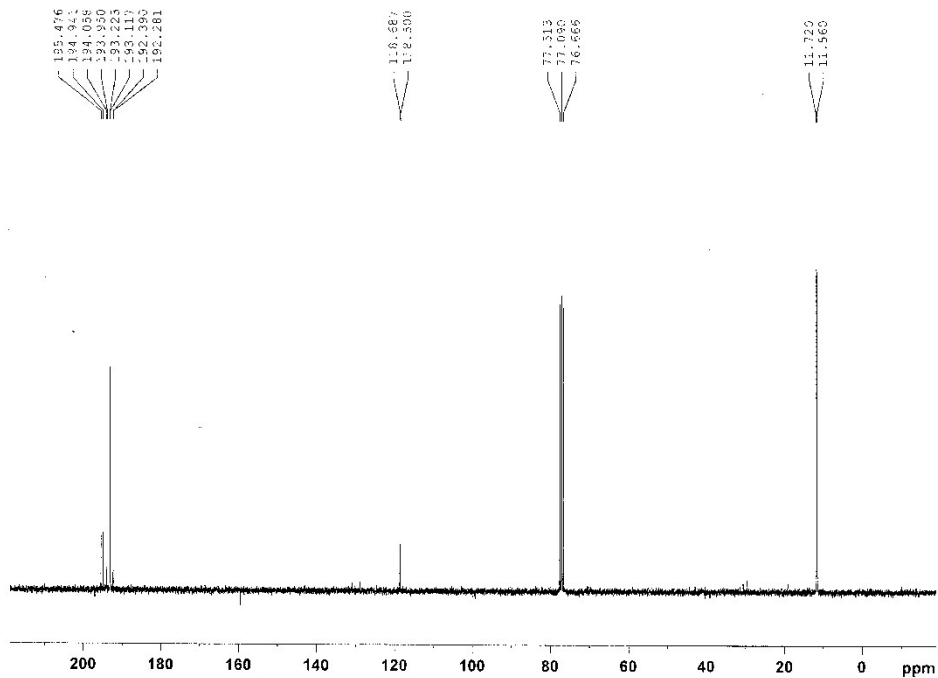

<sup>13</sup>C{<sup>1</sup>H} NMR of Compound 9a



hao-347 C13dept135/CDCl3

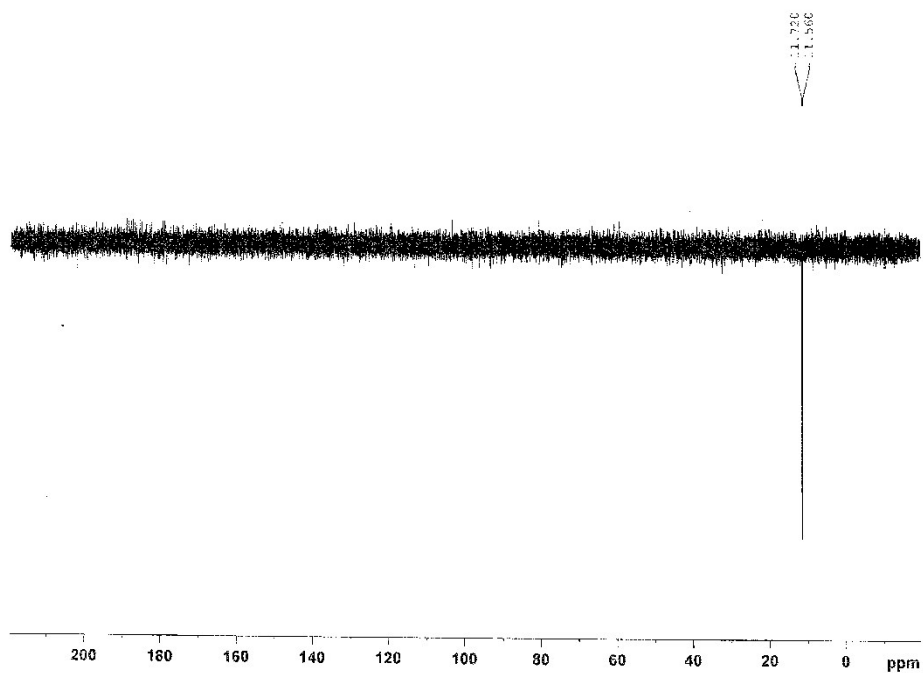

Dept135 NMR of Compound 9a

hao-374  $^{31}\text{P}$ NMR/CDCl<sub>3</sub>

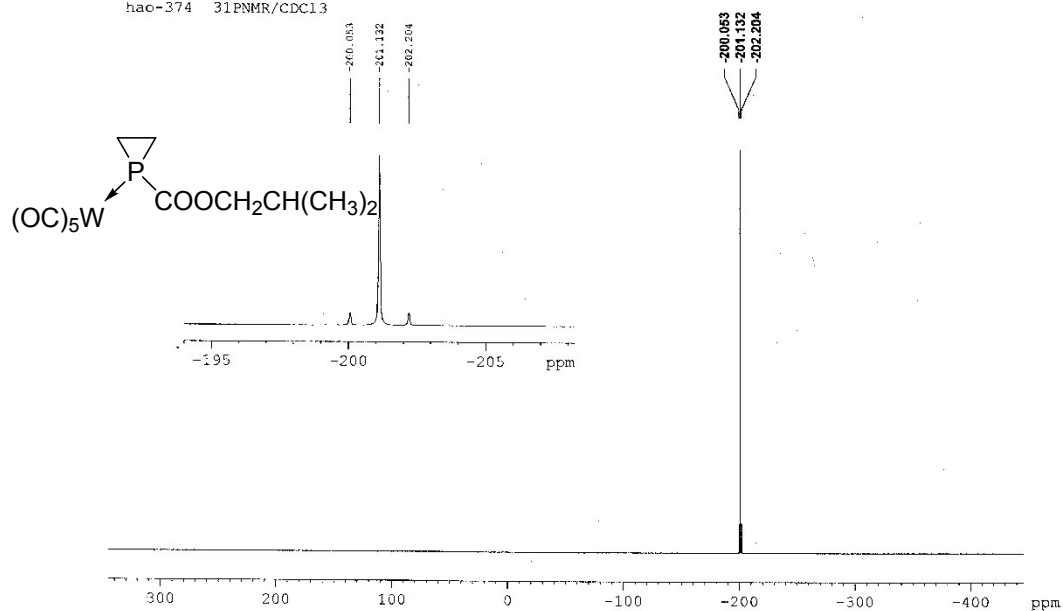

$^{31}\text{P}$  NMR of Compound 9b

hao-374 1HNMR/CDC13

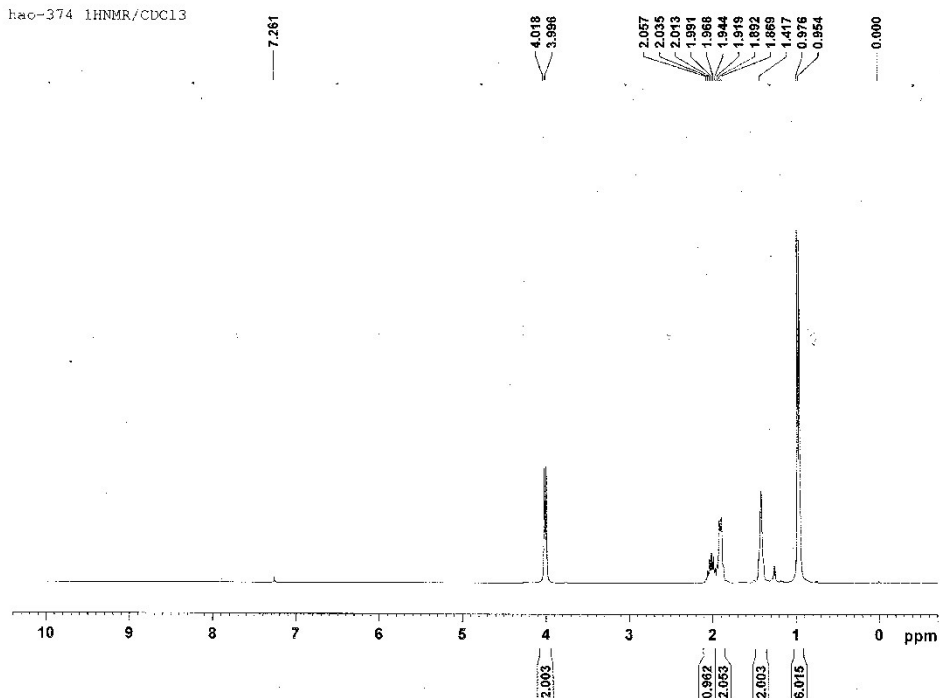

**<sup>1</sup>H NMR of Compound 9b**

hao-374 13CNMR/CDC13

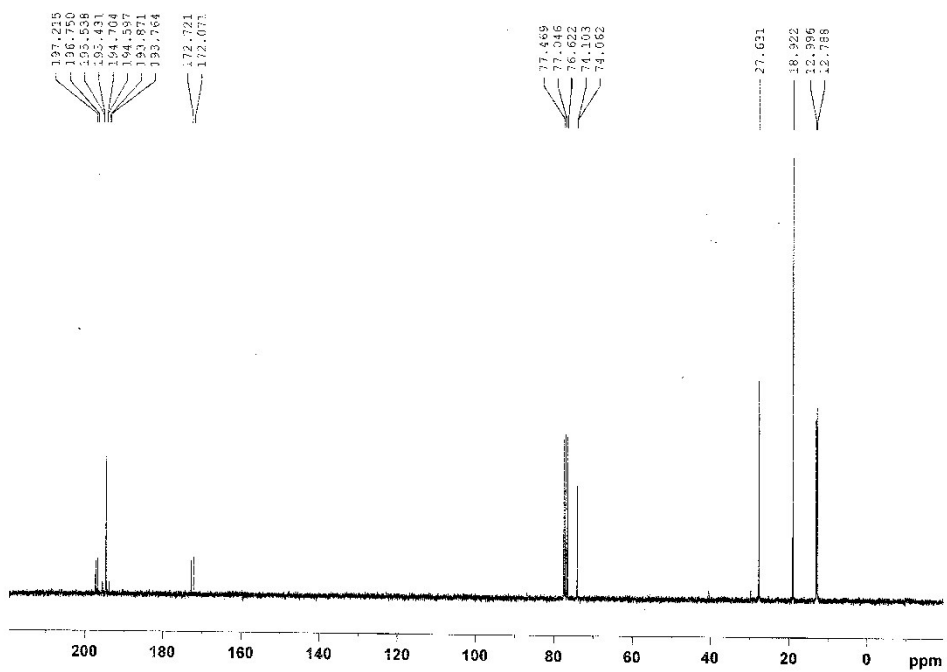

**<sup>13</sup>C{<sup>1</sup>H} NMR of Compound 9b**

hao-374 dept135/CDC13

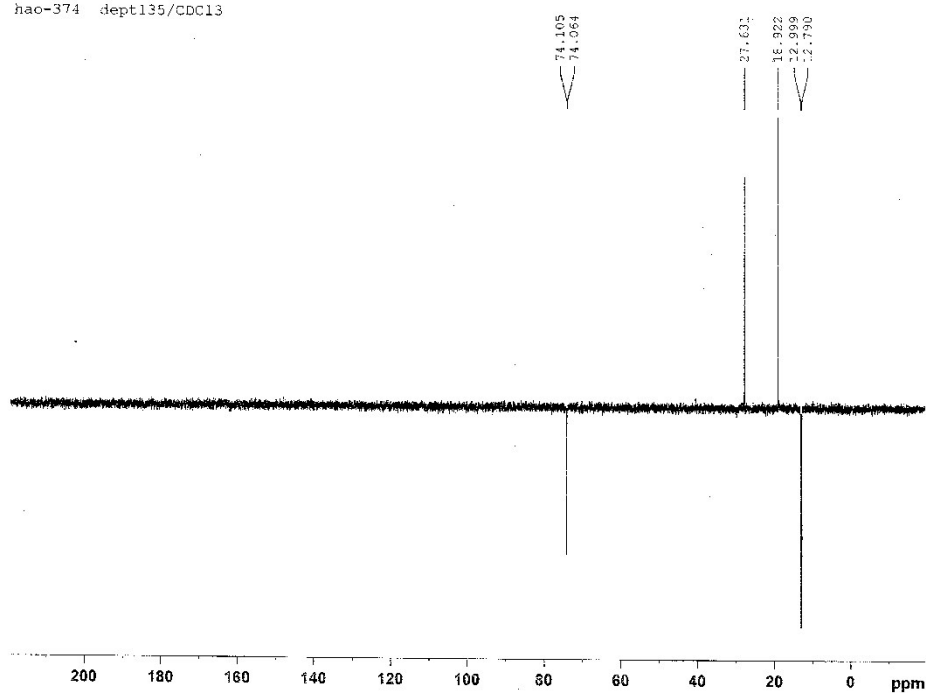

Dept135 NMR of Compound 9b

hao-354 31PNMR/CDC13

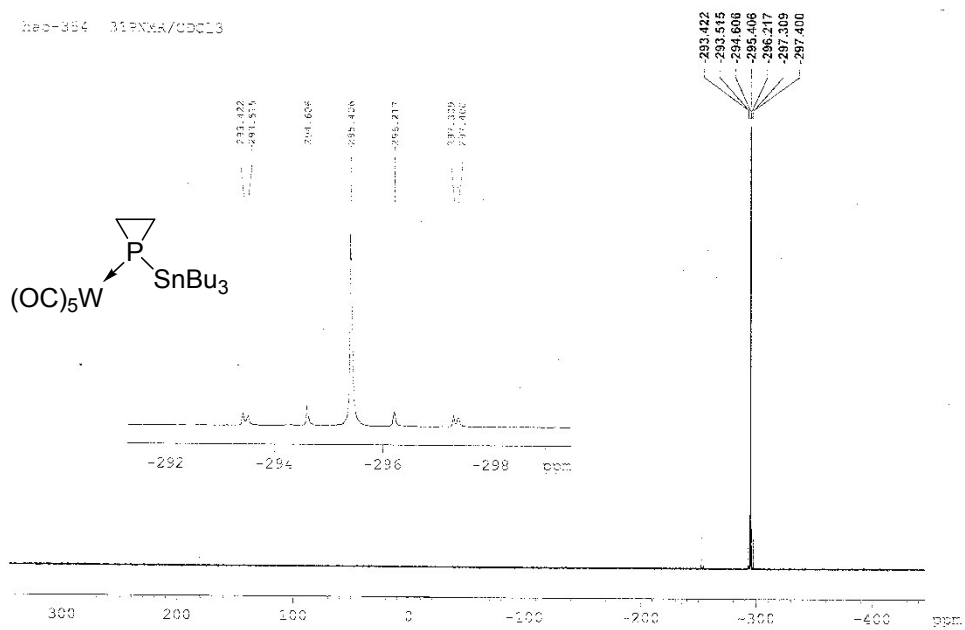

<sup>31</sup>P NMR of Compound 9c

hao-354 1H NMR/CDC13

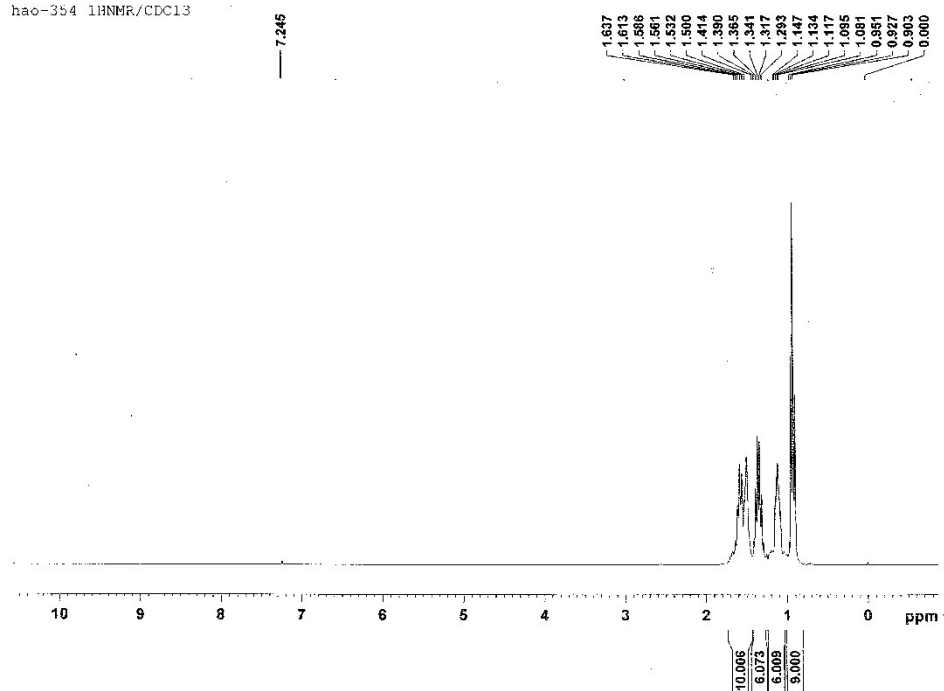

$^1\text{H}$  NMR of Compound 9c

hao-354  $^{13}\text{C}$  NMR/CDC13

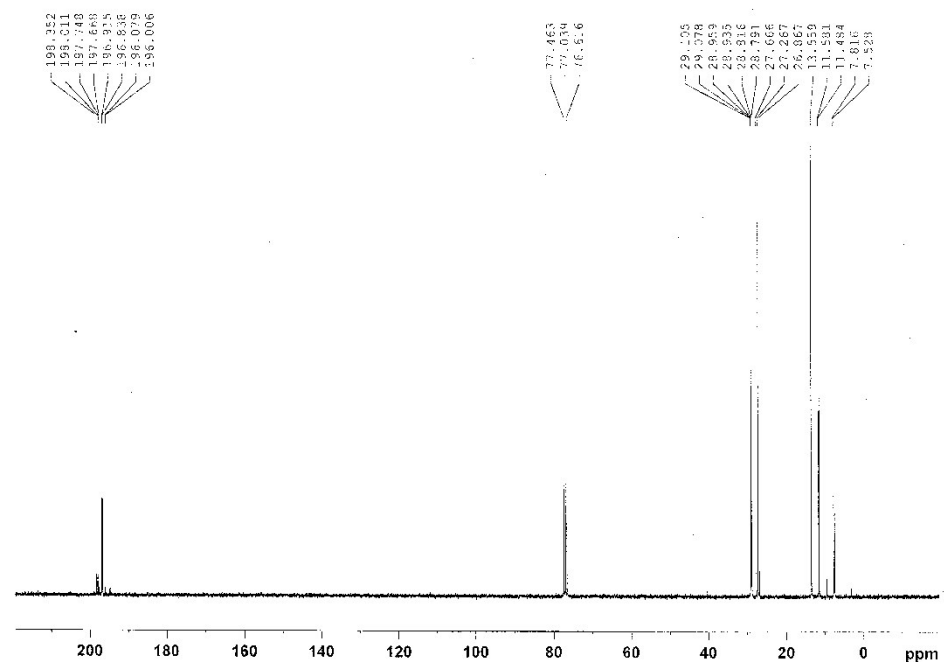

$^{13}\text{C}\{^1\text{H}\}$  NMR of Compound 9c

hao-354 dept135/CDCl3

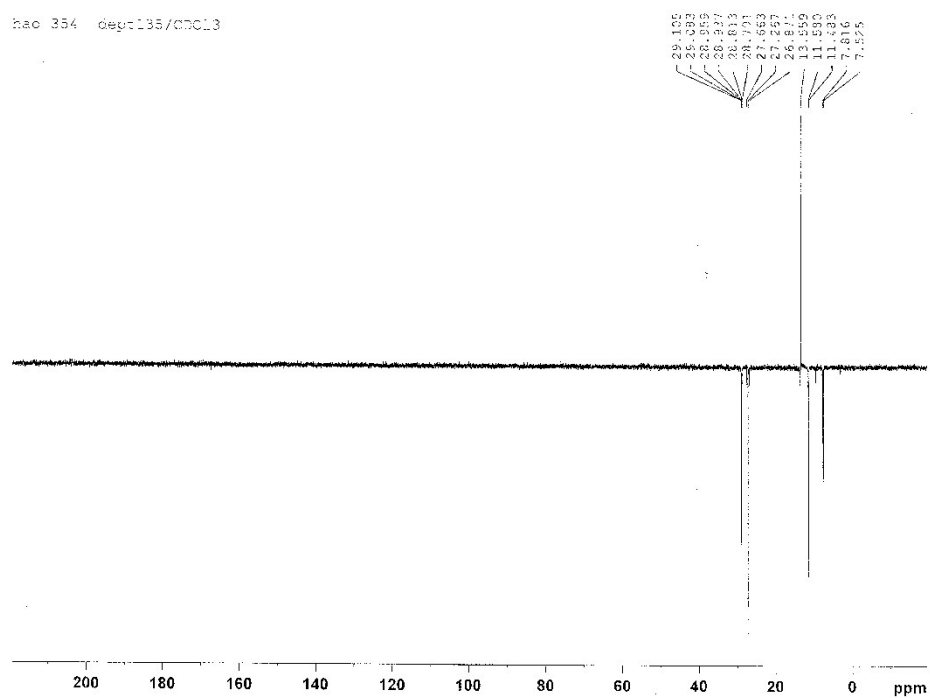

Dept135 NMR of Compound 9c

hao-378 31PCPD/CDCl3

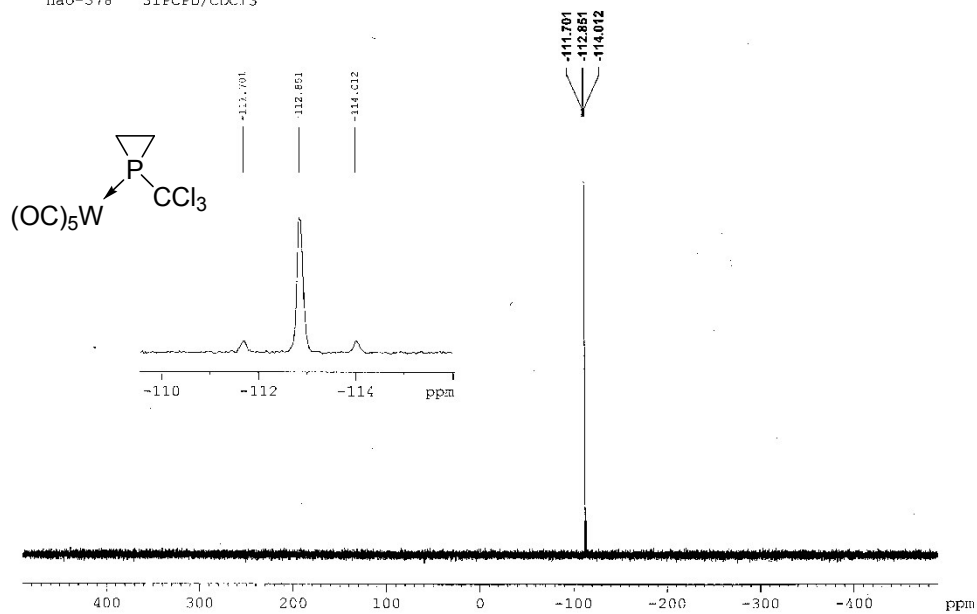

$^{31}\text{P}$  NMR of Compound 9d

hao-378 1H NMR/CDC13

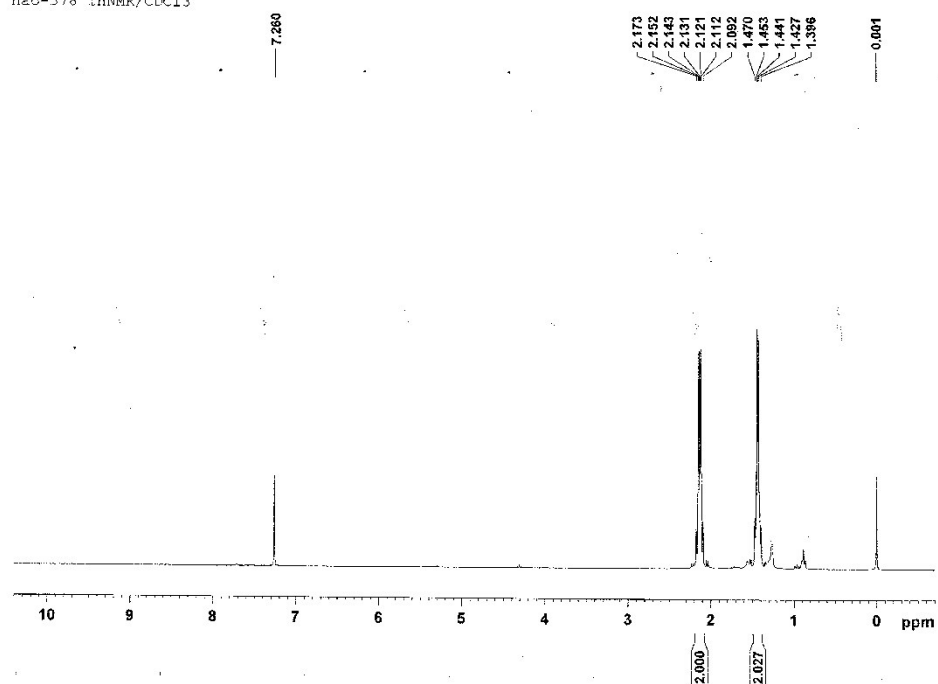

$^1\text{H}$  NMR of Compound 9d

hao-378  $^{13}\text{C}$ CPD/CDC13

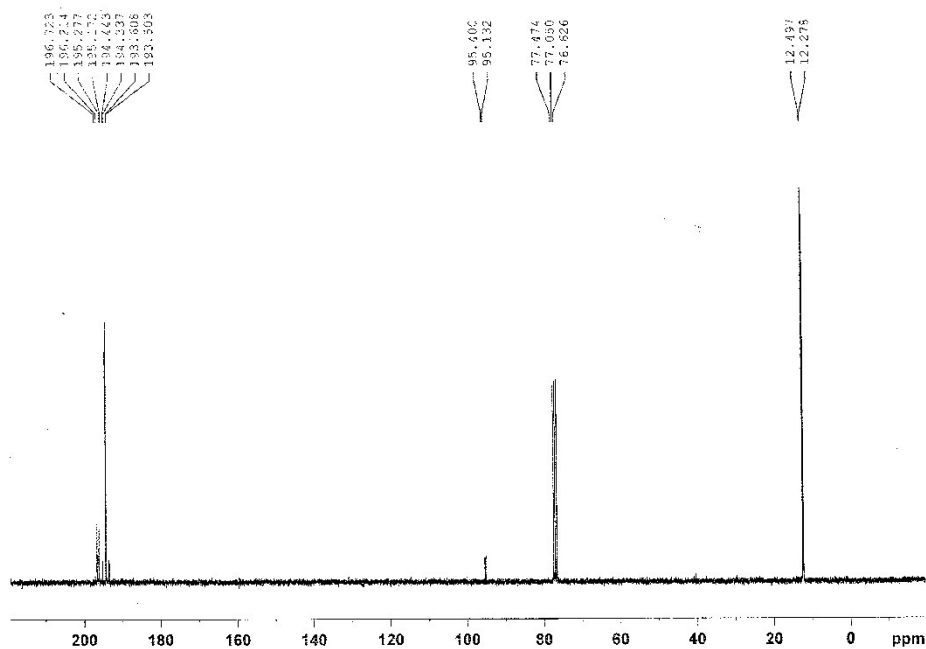

$^{13}\text{C}\{^1\text{H}\}$  NMR of Compound 9d

hao-357 31PNMR/CDC13

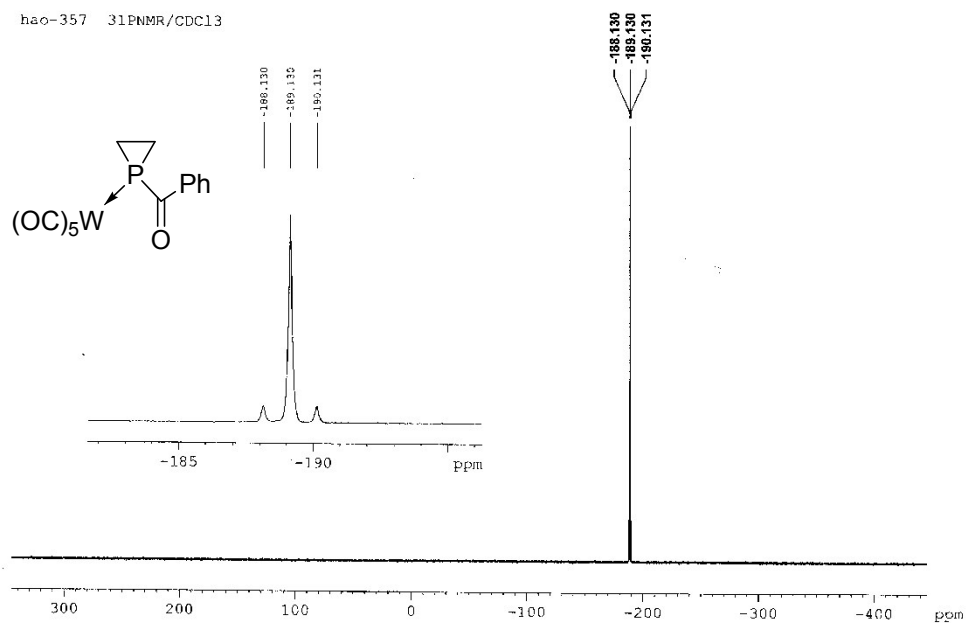

**<sup>31</sup>P NMR of Compound 9e**

hao-357 1HNMR/CDC13

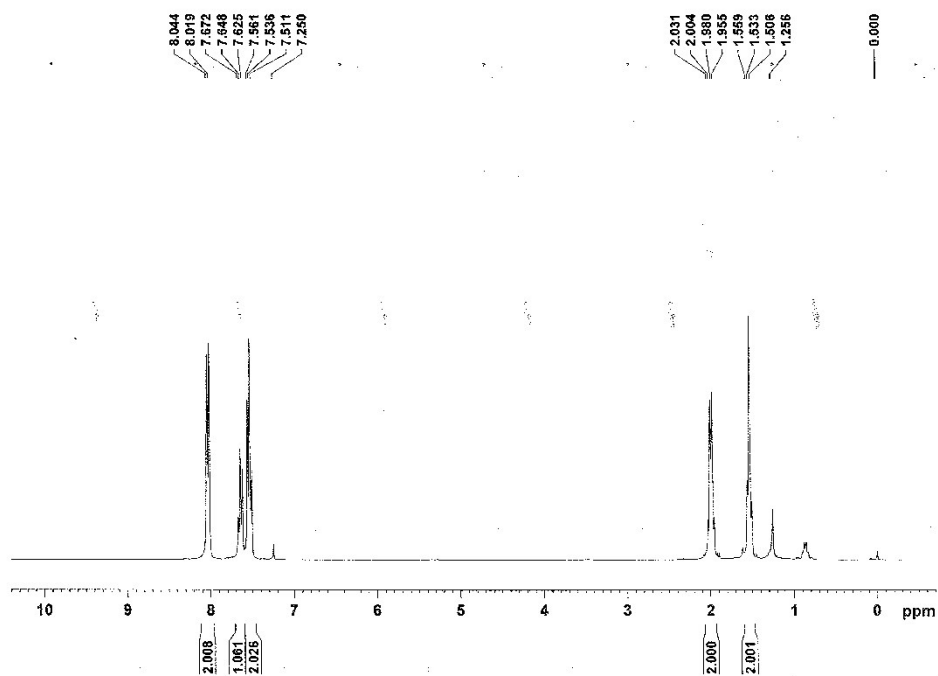

**<sup>1</sup>H NMR of Compound 9e**

hao-357 <sup>13</sup>CNMR/CDC13

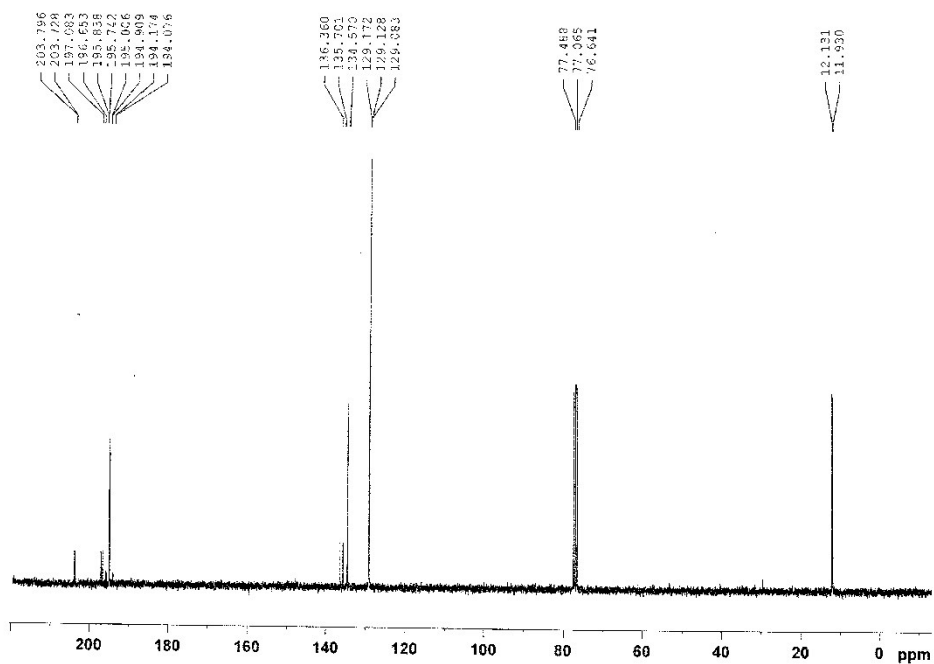

<sup>13</sup>C{<sup>1</sup>H} NMR of Compound 9e

hao-357 dept13b/CDC13

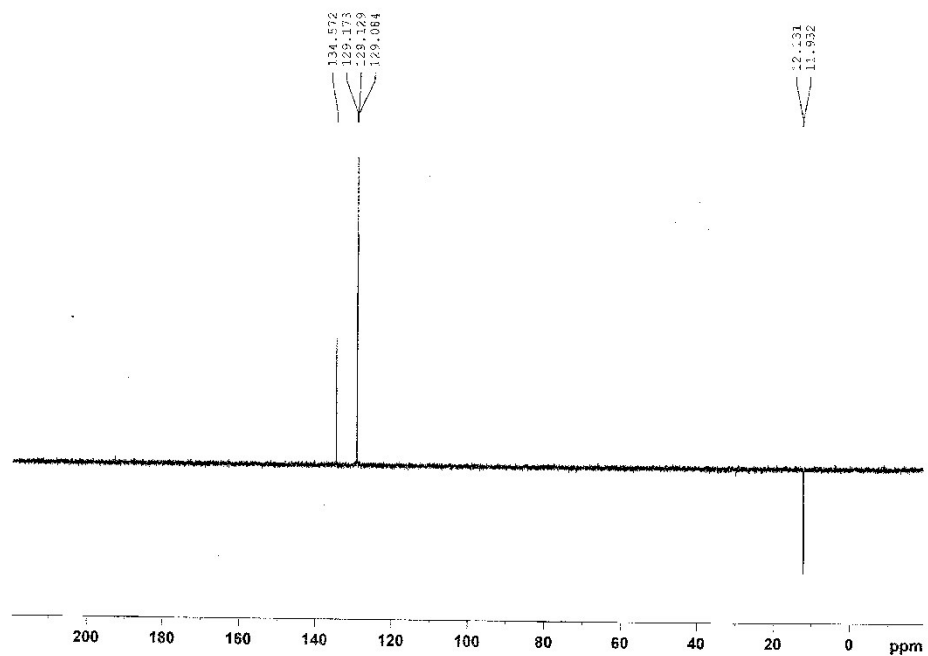

Dept135 NMR of Compound 9e



hao-395 31PCPD/CDC13

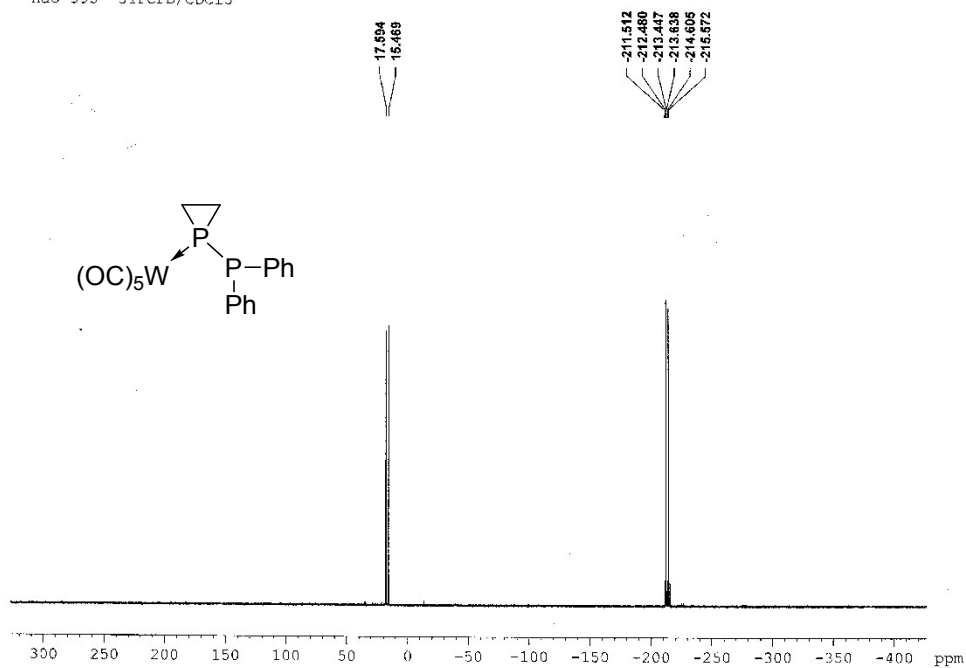

<sup>31</sup>P NMR of Compound 9f

hao-395 1HNMR/CDC13

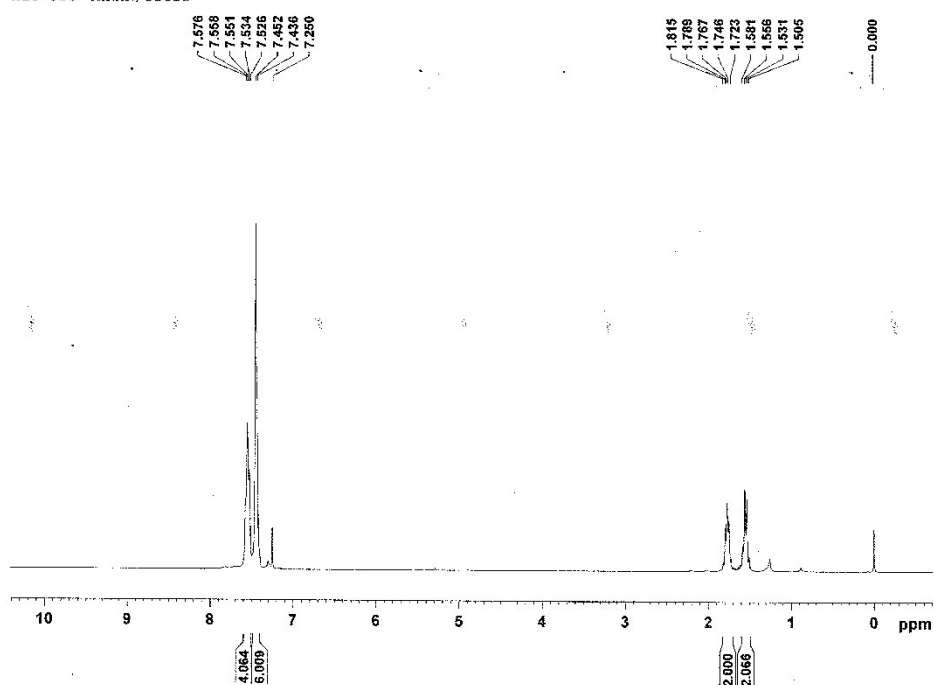

<sup>1</sup>H NMR of Compound 9f

hao-395 C13CPD/CDC13

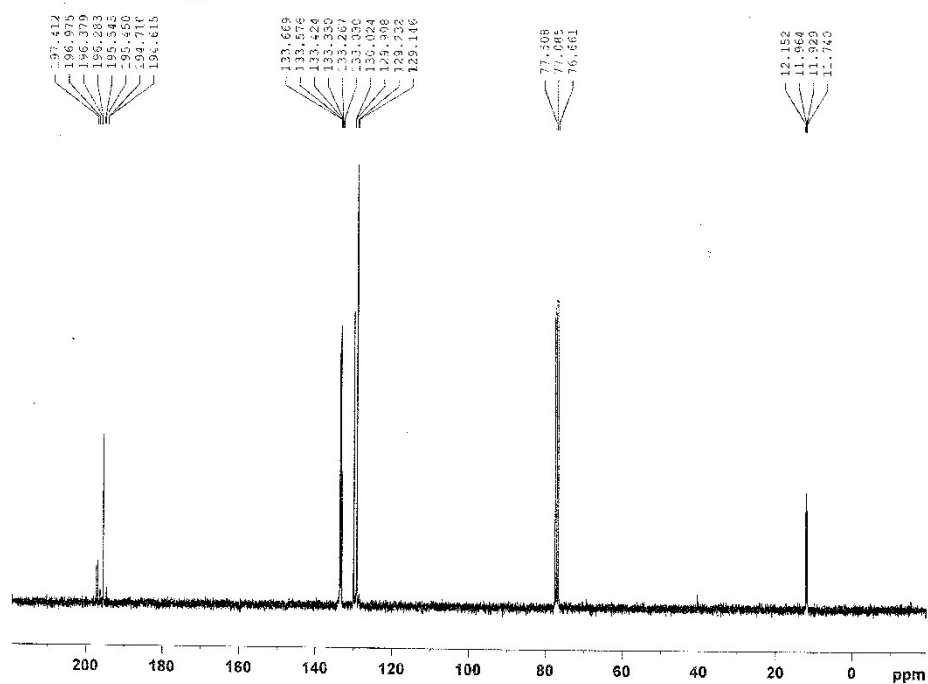

$^{13}\text{C}\{^1\text{H}\}$  NMR of Compound 9f

hao-395 C13DEPT135/CDC13

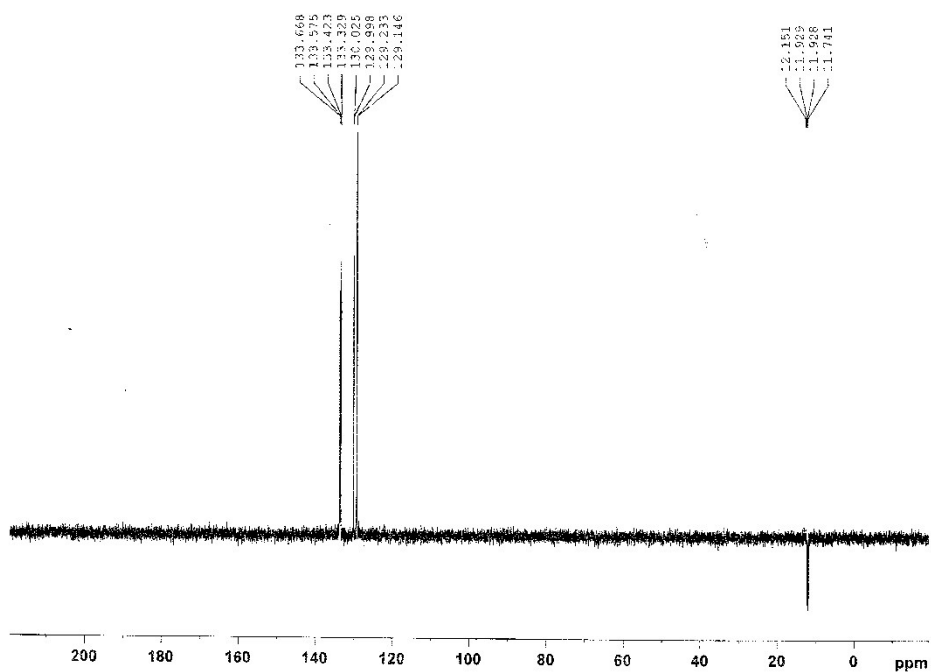

DEPT135 NMR of Compound 9f

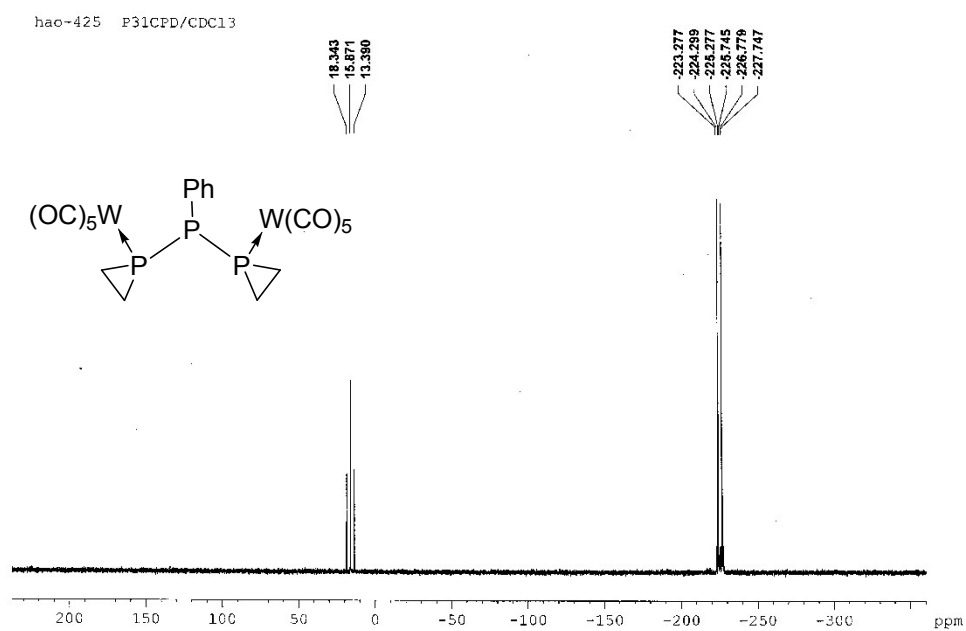

**<sup>31</sup>P NMR of Compound 9g**

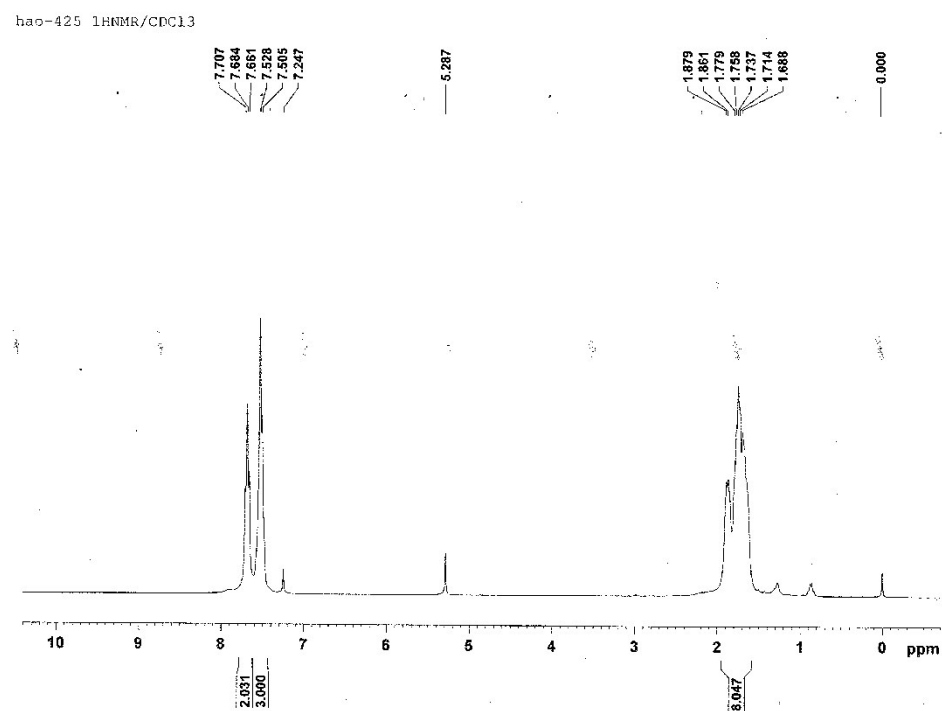

**<sup>1</sup>H NMR of Compound 9g**

hao-425 C13CPD/CDC13

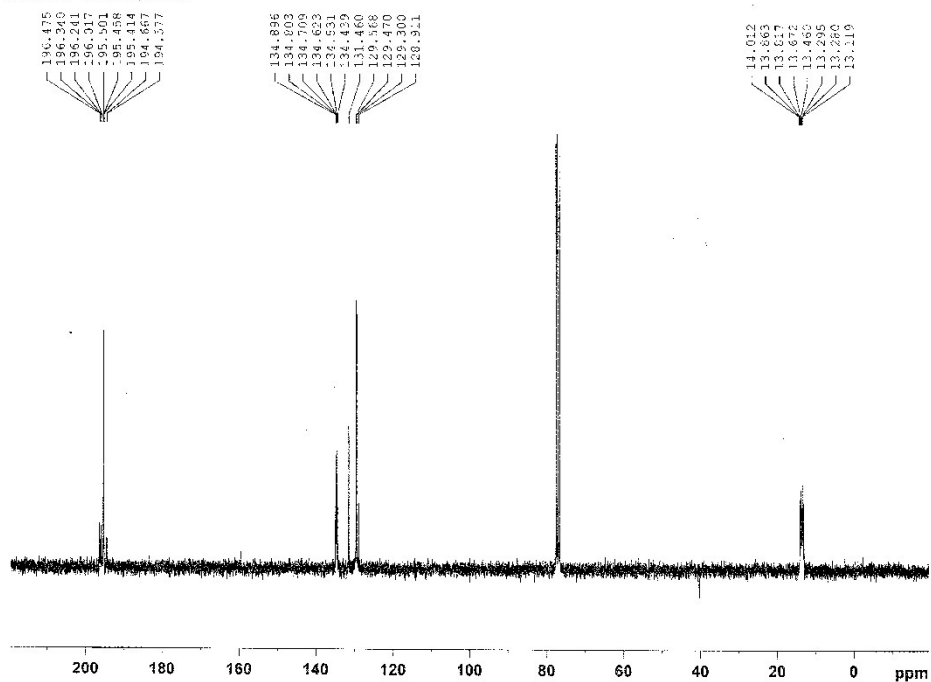

$^{13}\text{C}\{^1\text{H}\}$  NMR of Compound 9g

hao-425 dept135/CDC13

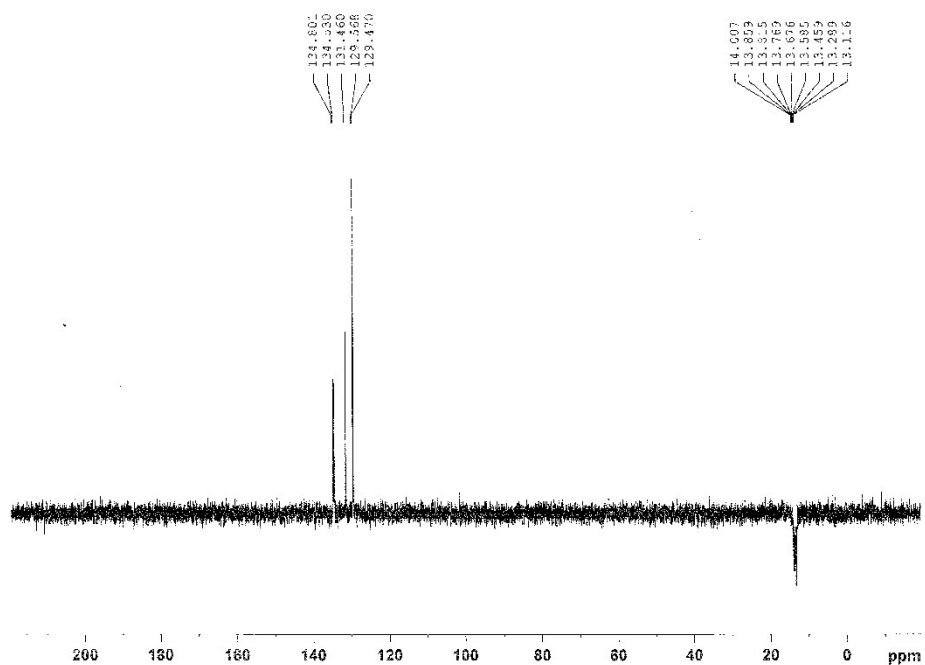

Dept135 NMR of Compound 9g

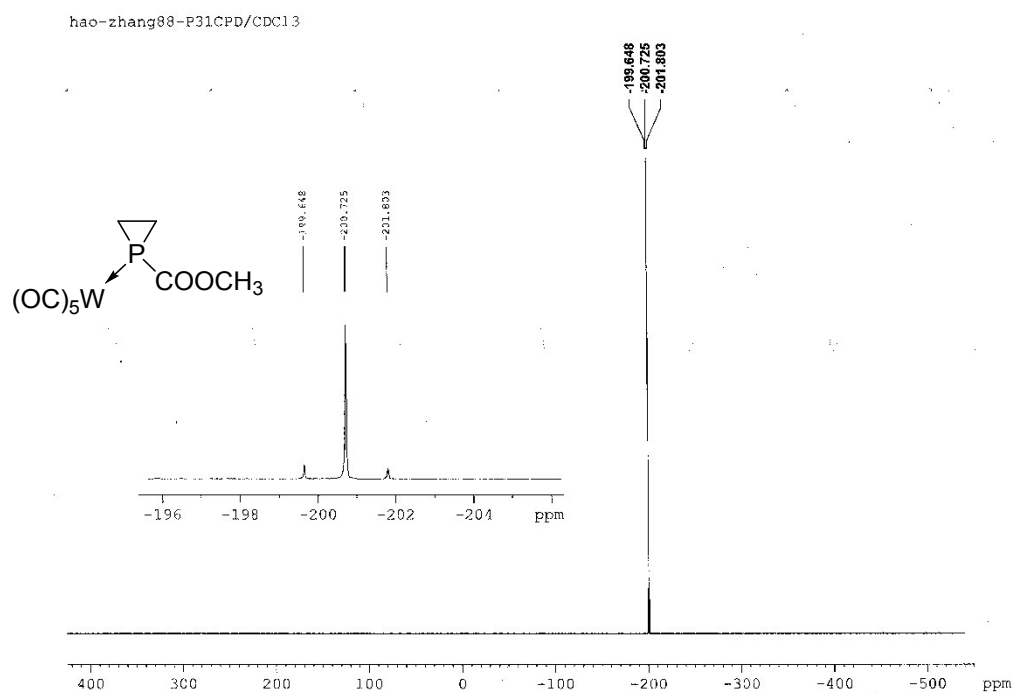

**<sup>31</sup>P NMR of Compound 9h**

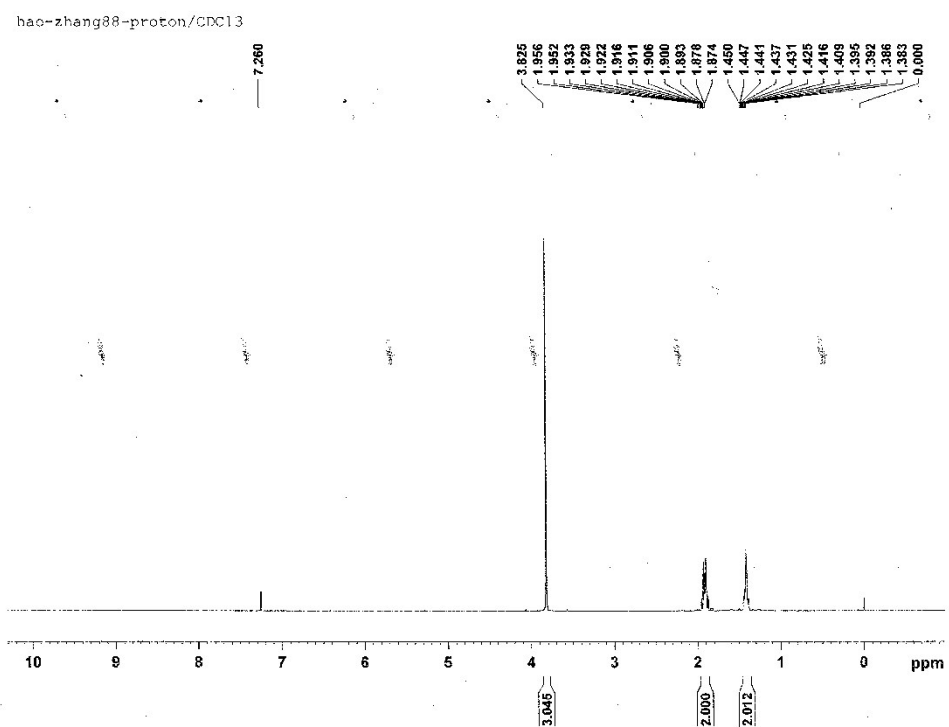

**<sup>1</sup>H NMR of Compound 9h**

hao-zhang88-C13CPD/CDC13

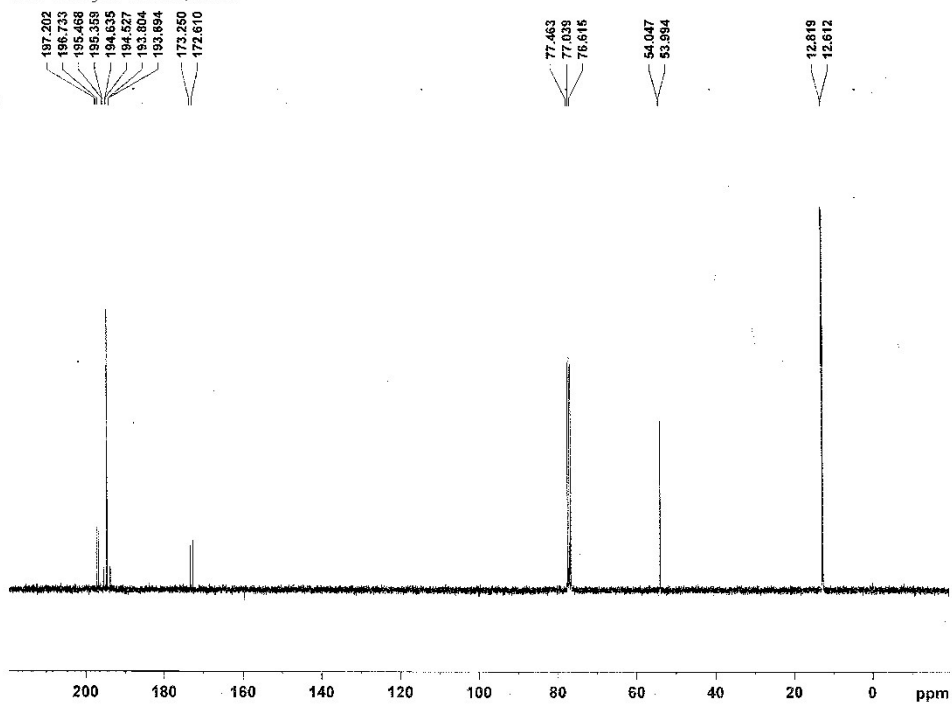

$^{13}\text{C}\{^1\text{H}\}$  NMR of Compound 9h

hao-zhang88-C13DEPT135/CDC13

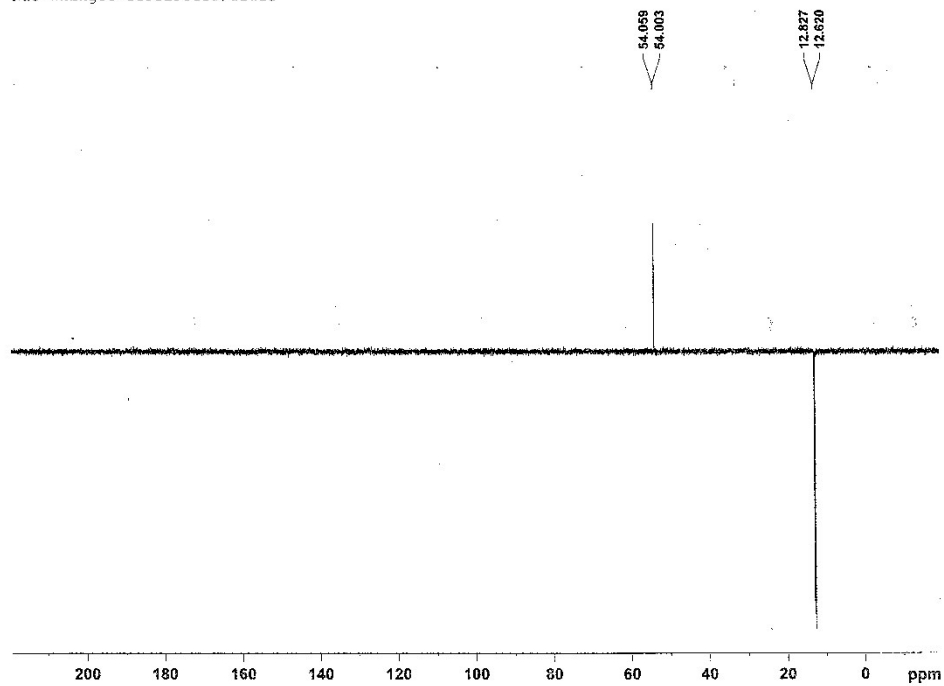

DEPT135 NMR of Compound 9h

hao-zhang89-P31CPD/CDC13

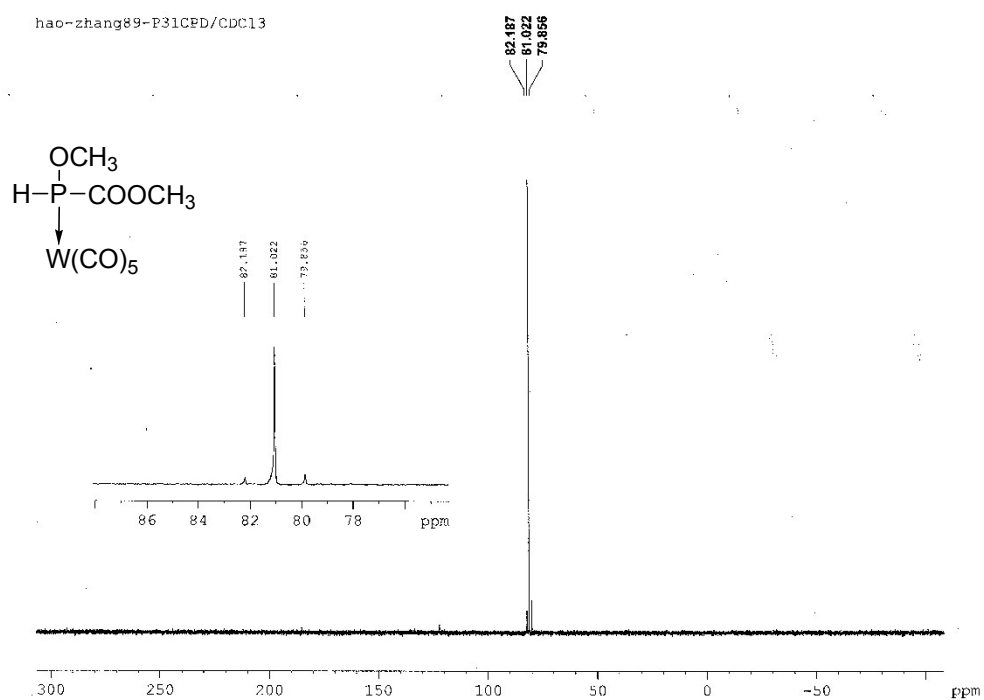

$^{31}\text{P}$  NMR of Compound 10

hao-zhang89-P31/CDC13

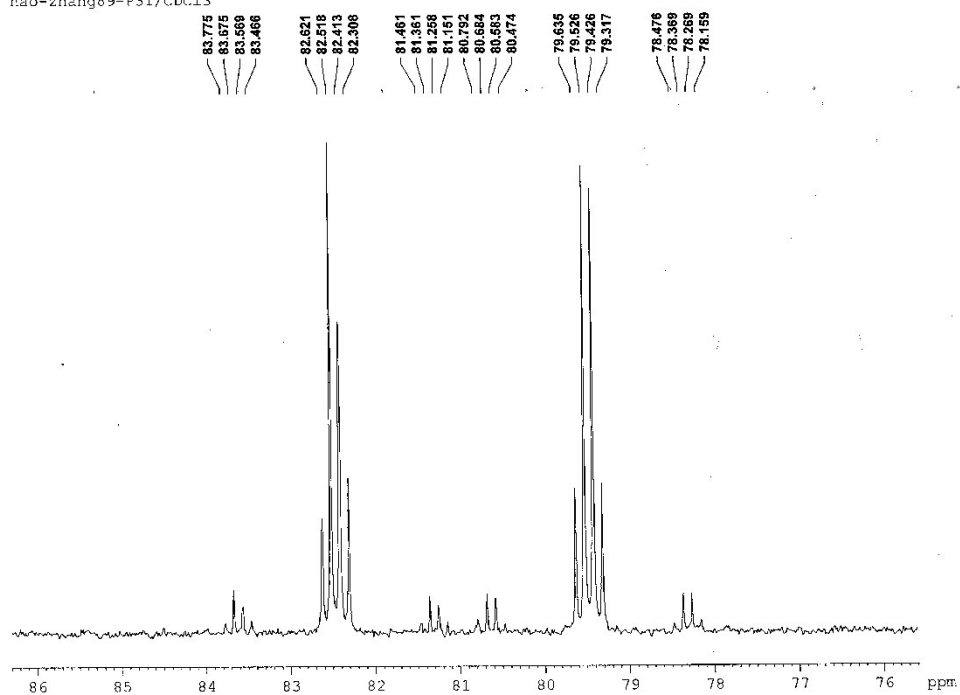

$^{31}\text{P}$  NMR of Compound 10

hao-zhang89-PROTON/CDC13

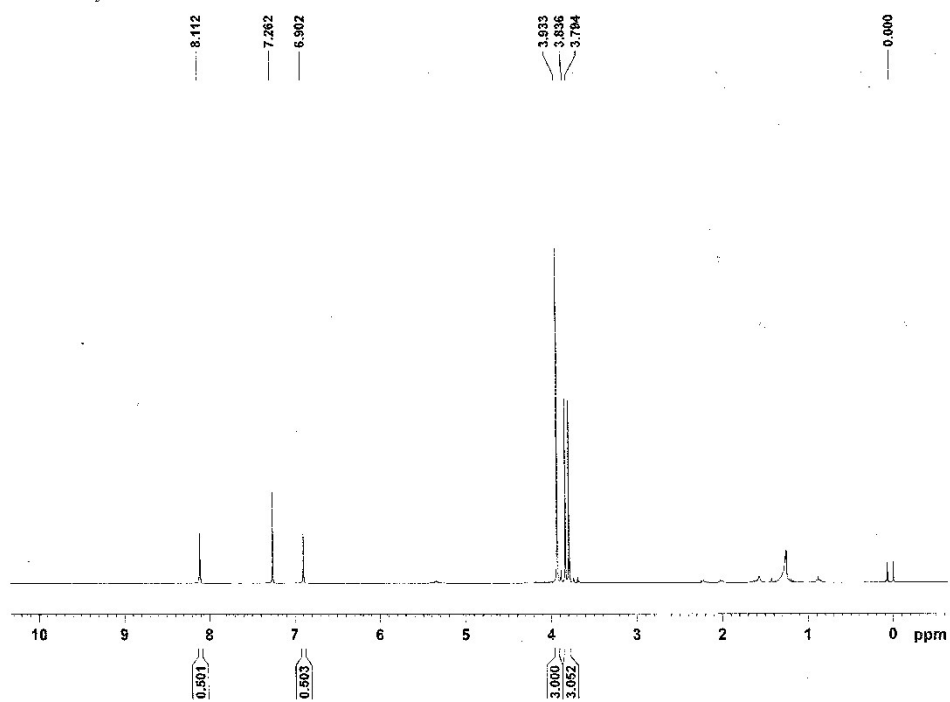

**<sup>1</sup>H NMR of Compound 10**

hao-zhang89-C13CPD/CDC13

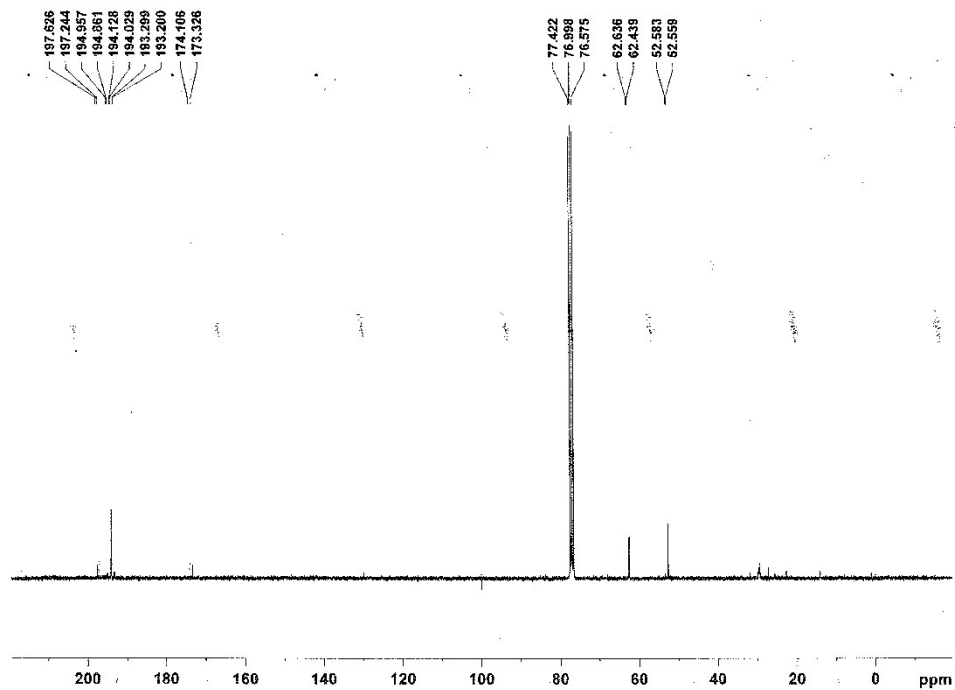

**<sup>13</sup>C{<sup>1</sup>H} NMR of Compound 10**



hao-zhang89-C13DEPT135/CDC13

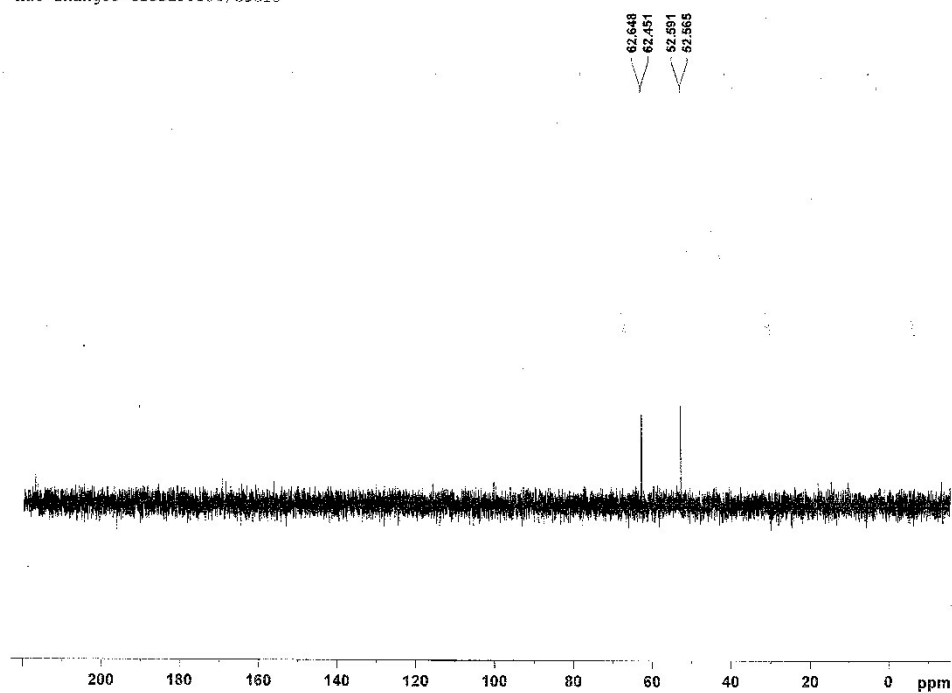

Dept135 NMR of Compound 10

hao-zhang93-P31CPD/CDC13

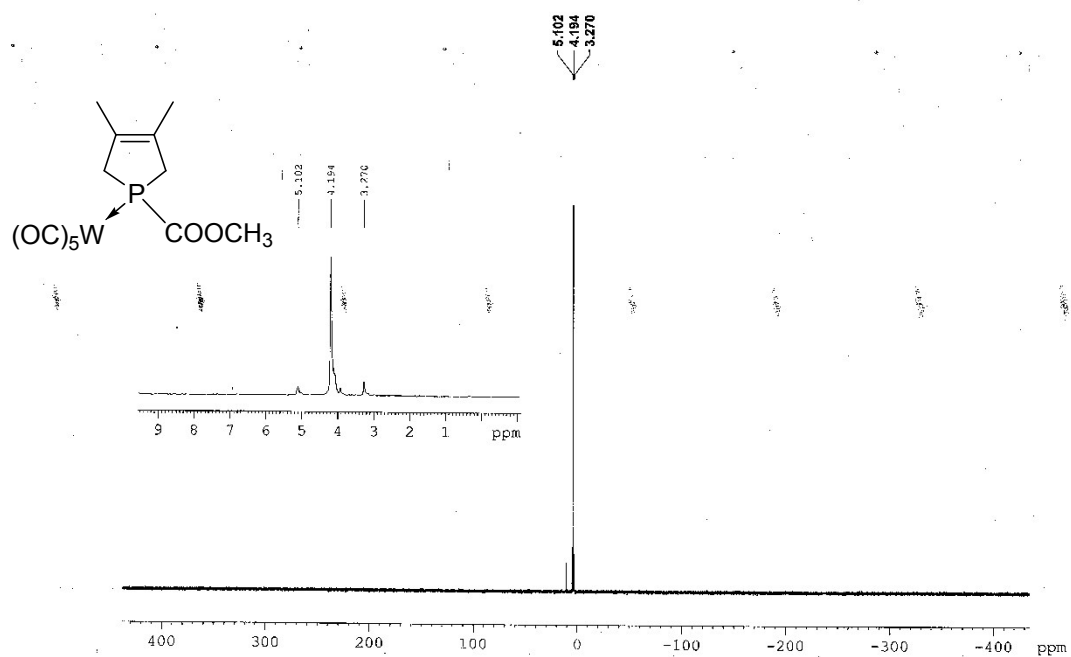

<sup>31</sup>P NMR of Compound 11

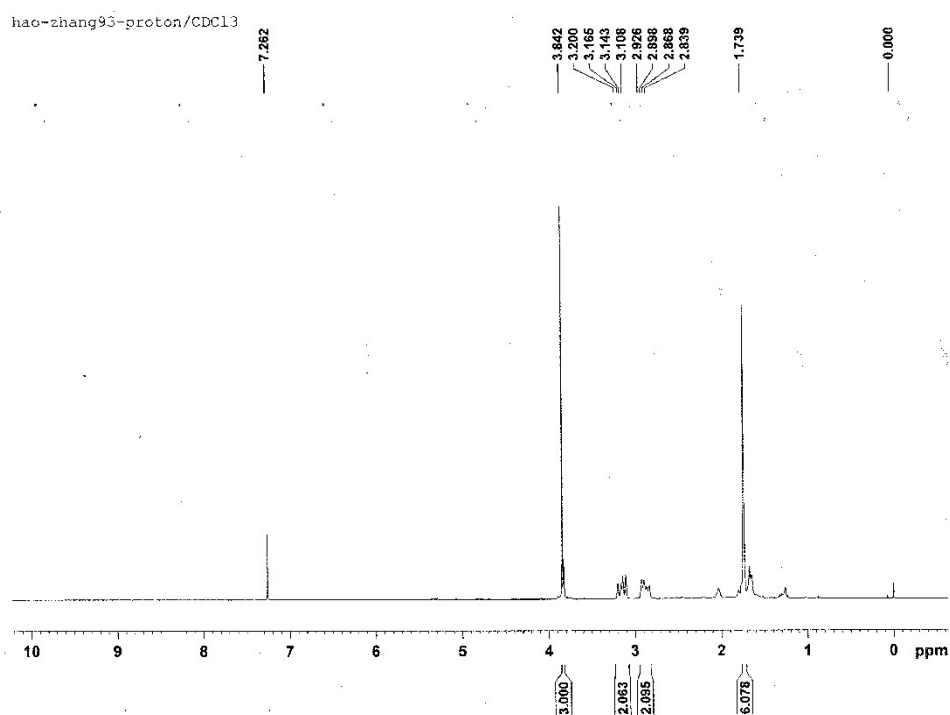

$^1\text{H}$  NMR of Compound 11

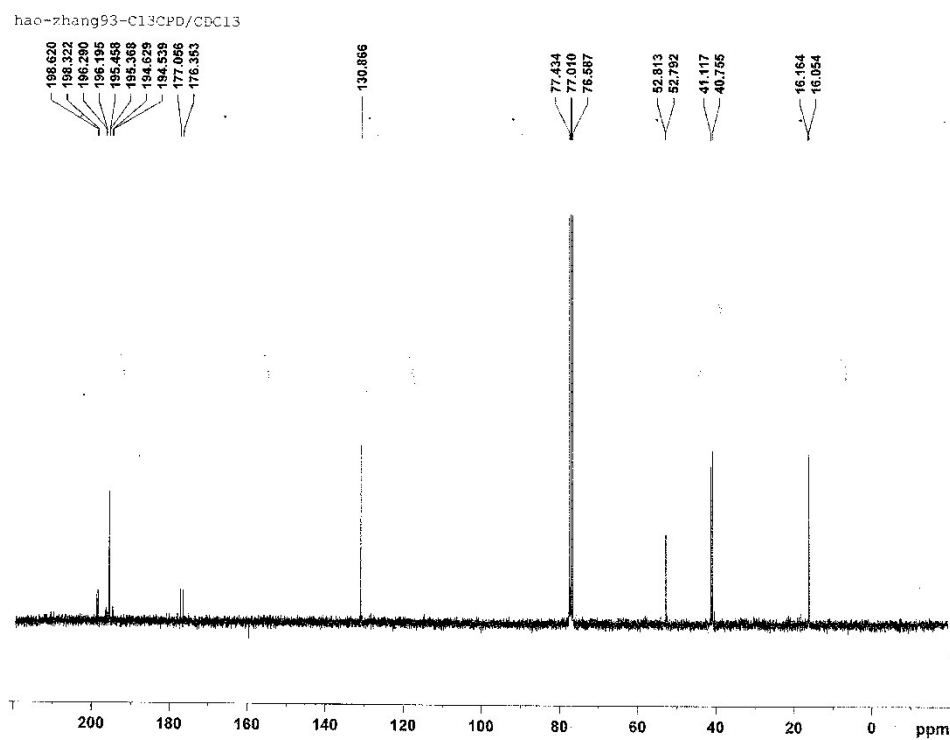

$^{13}\text{C}\{^1\text{H}\}$  NMR of Compound 11

hao-zhang93-C13DEPT135/CDC13

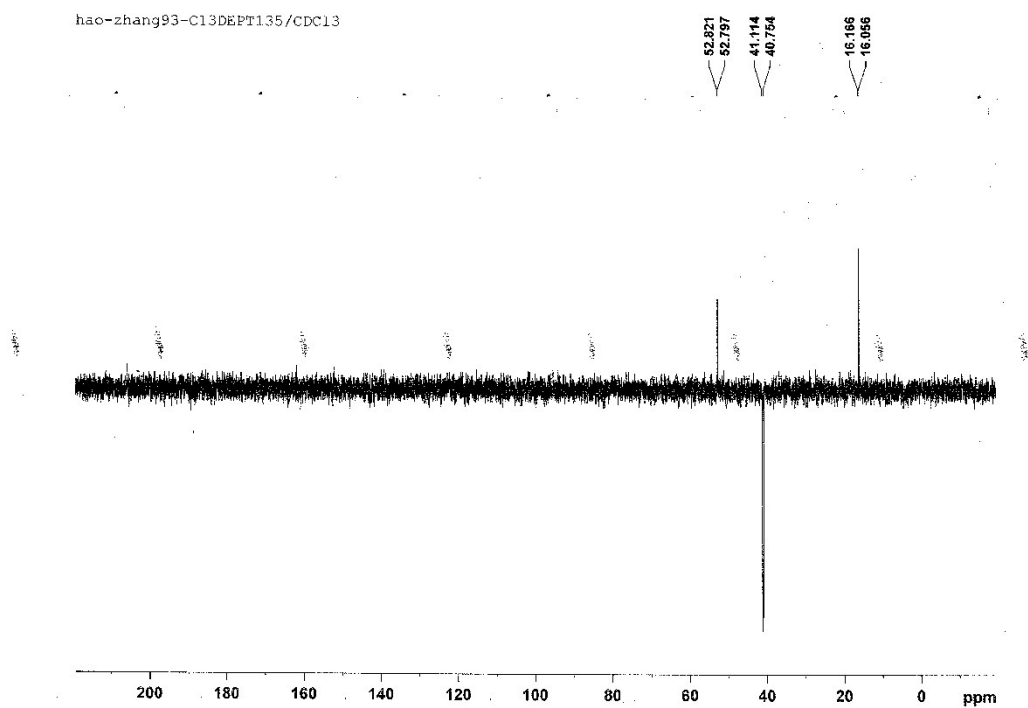

Dept135 NMR of Compound 11

hao-560 P31CPD/CDC13

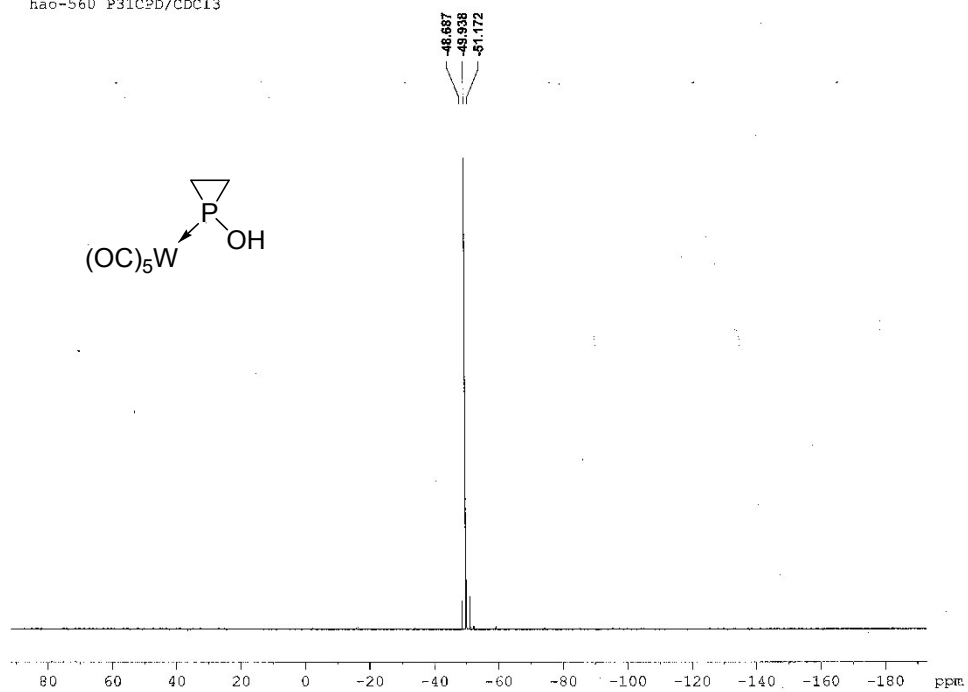

<sup>31</sup>P NMR of Compound 12

hao-560 proton/CDC13

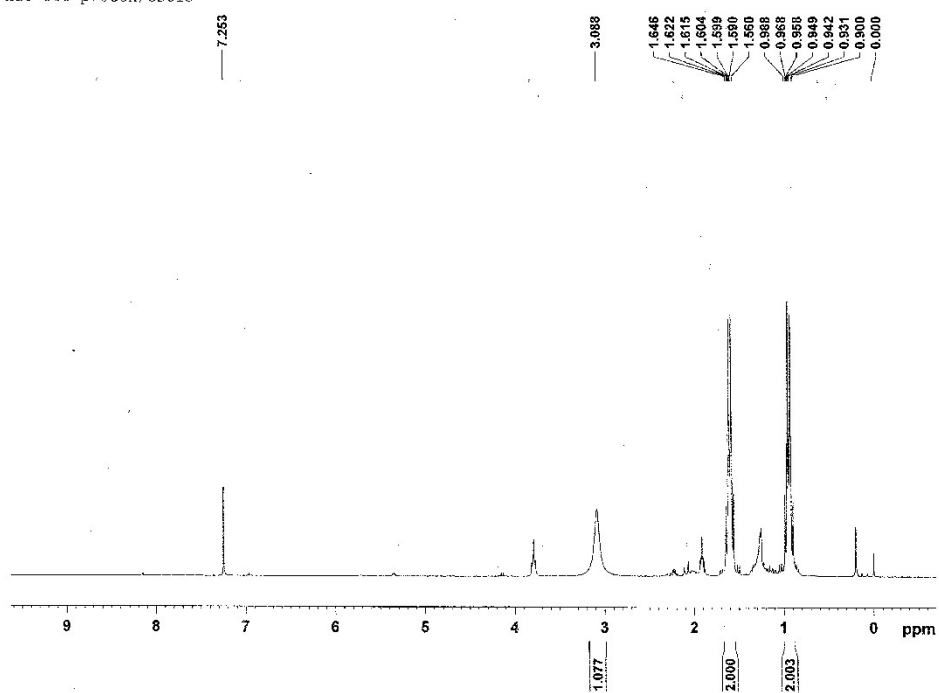

$^1\text{H}$  NMR of Compound 12

hao-560 C13CPD/CDCl3

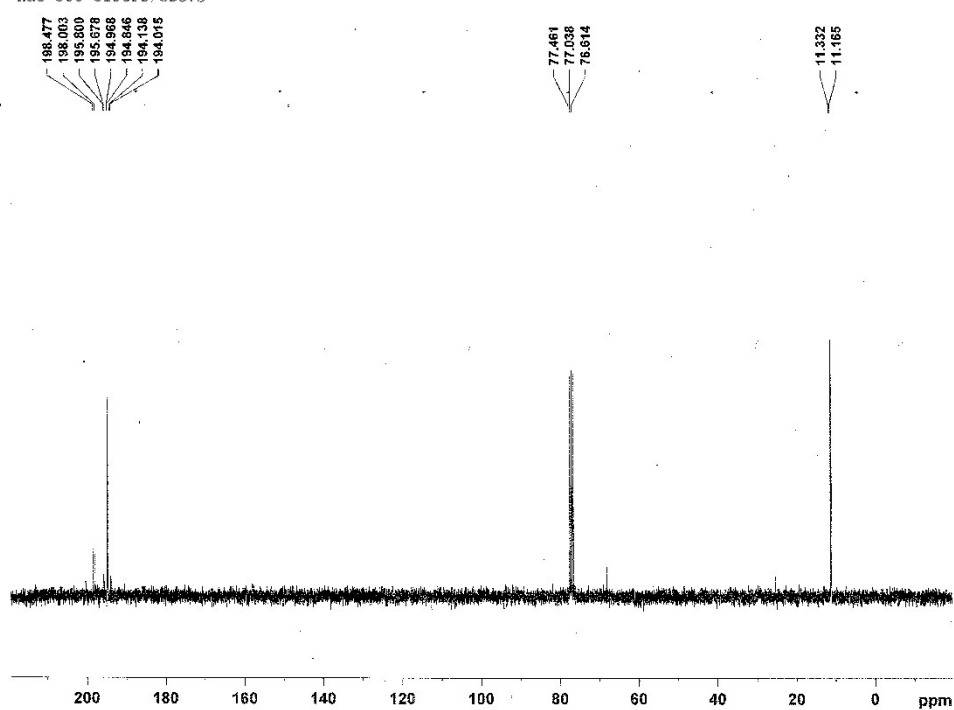

$^{13}\text{C}\{^1\text{H}\}$  NMR of Compound 12

hao-494 P31CPD/CDC13

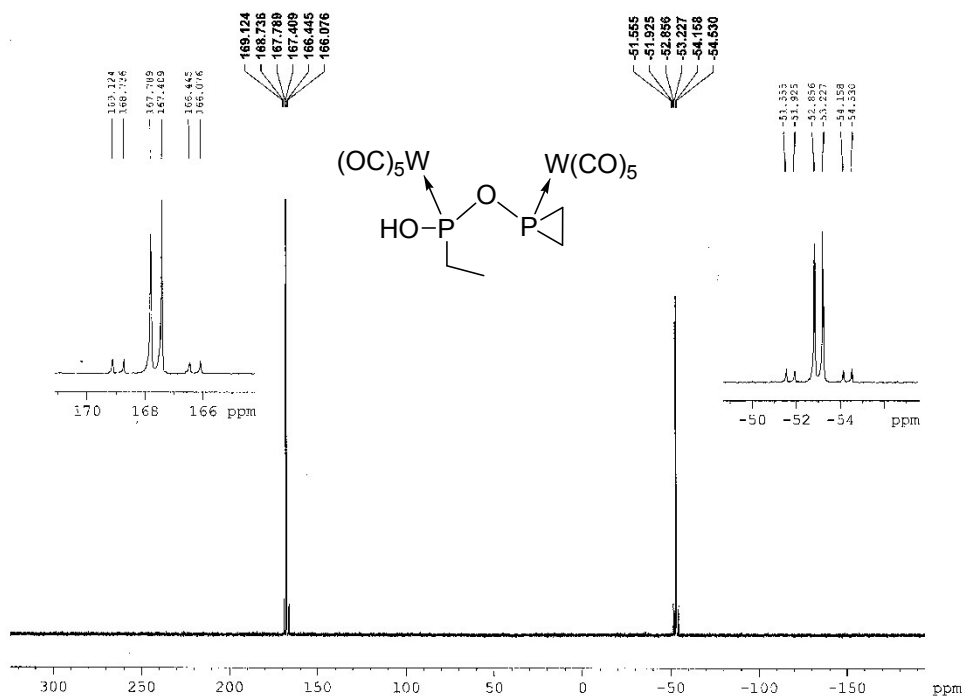

<sup>31</sup>P NMR of Compound 13

hao-494 proton/CDC13

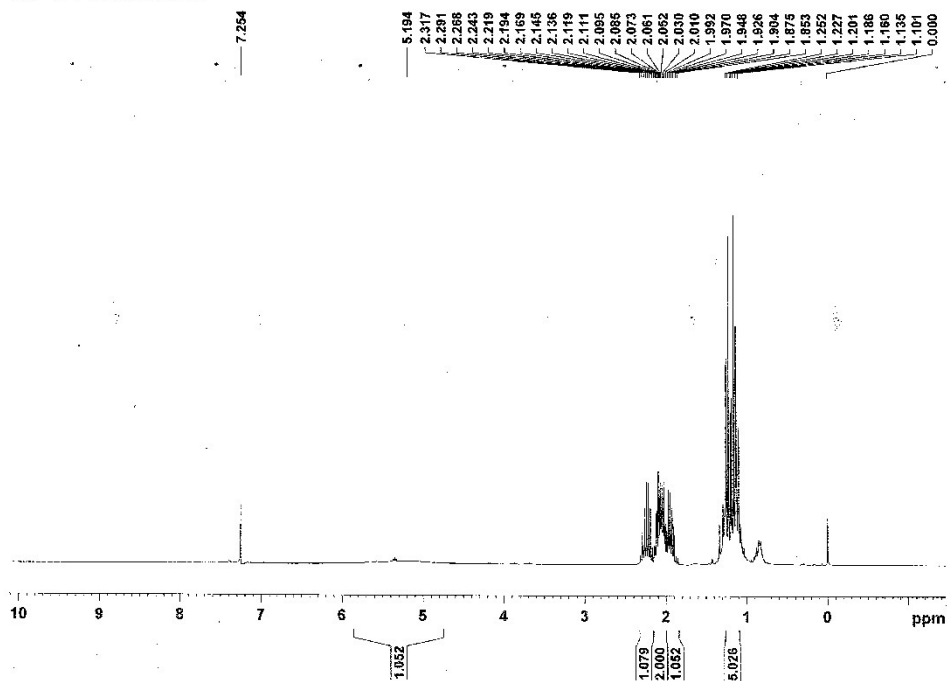

<sup>1</sup>H NMR of Compound 13

hao-494 C13CPD/CDCl3

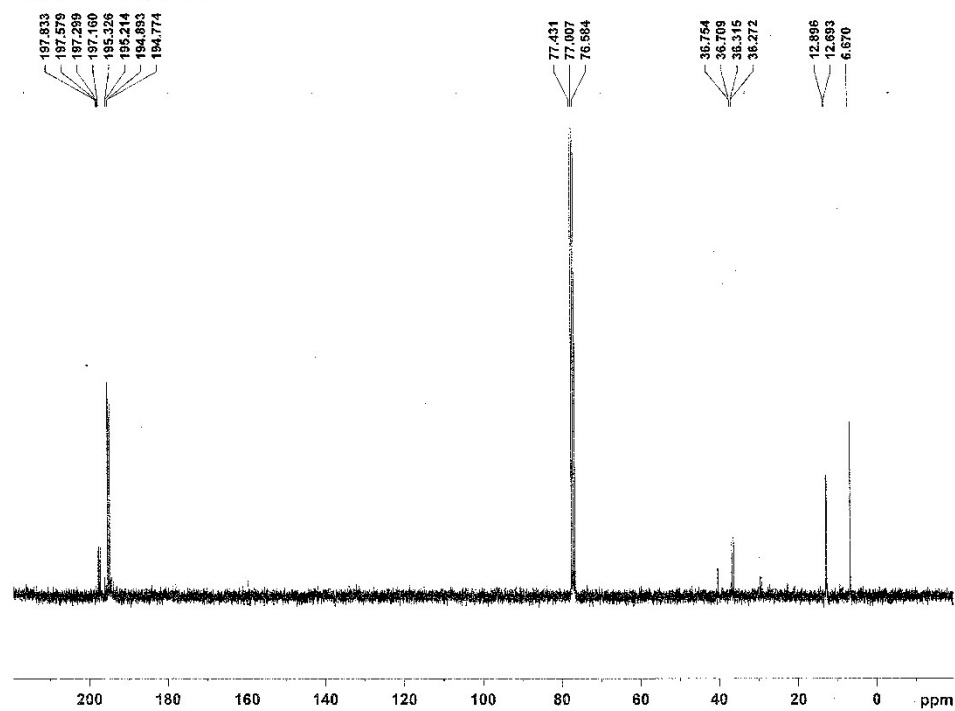

$^{13}\text{C}\{^1\text{H}\}$  NMR of Compound 13

hao-494 C13DEPT135/CDCl3

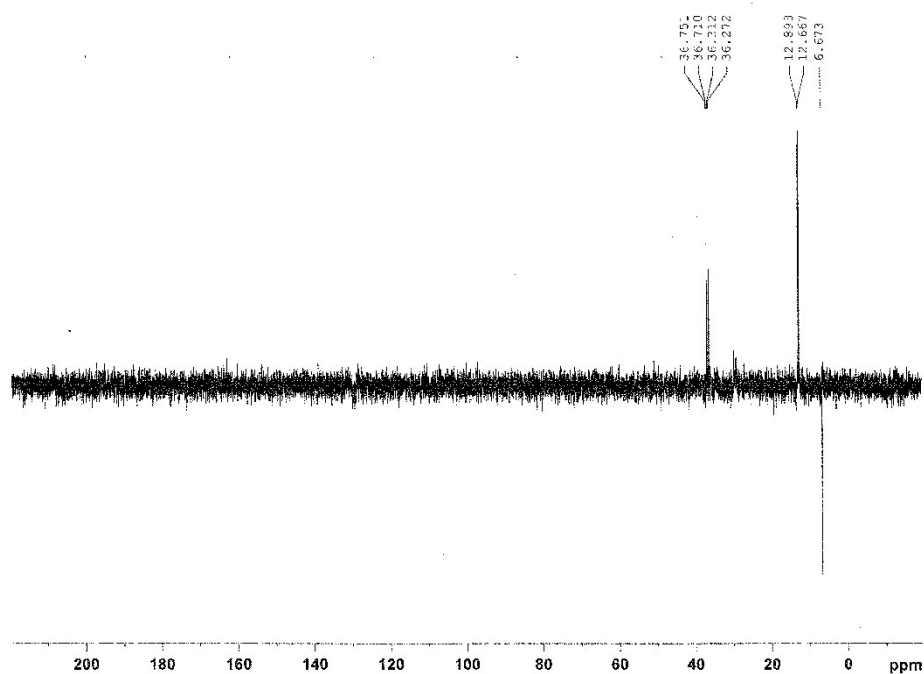

Dept135 NMR of Compound 13

hao-487 P31CPD/CDC13

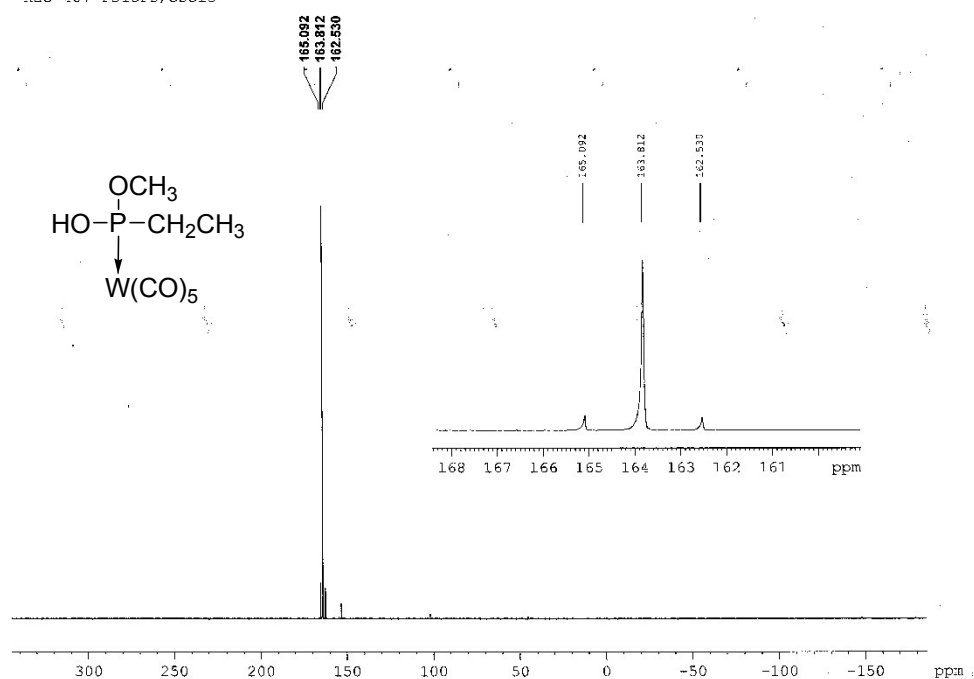

$^{31}\text{P}$  NMR of Compound 14

hao-487 proton/CDC13

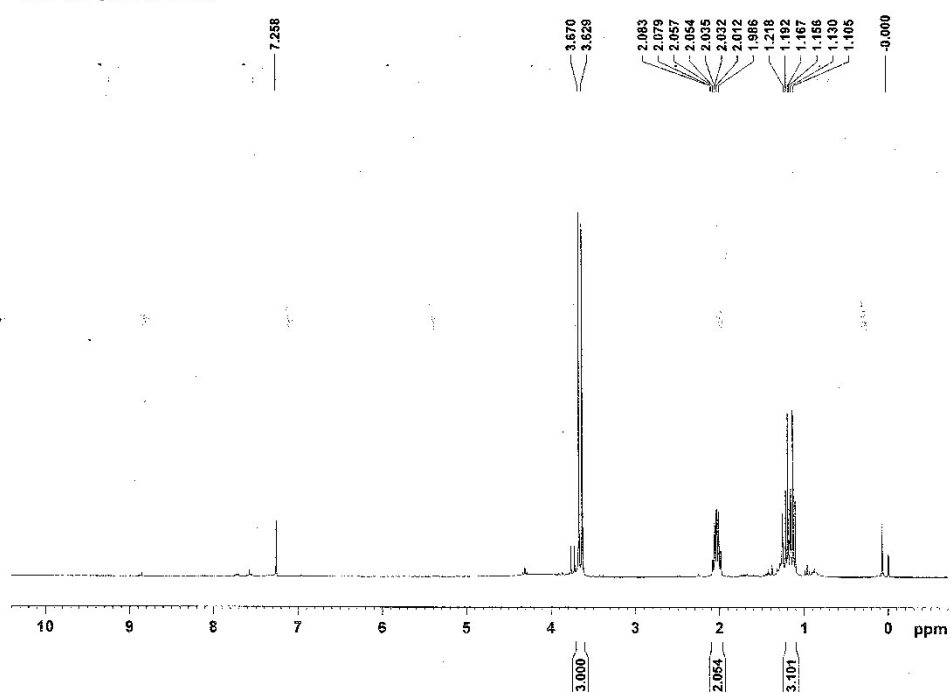

$^1\text{H}$  NMR of Compound 14

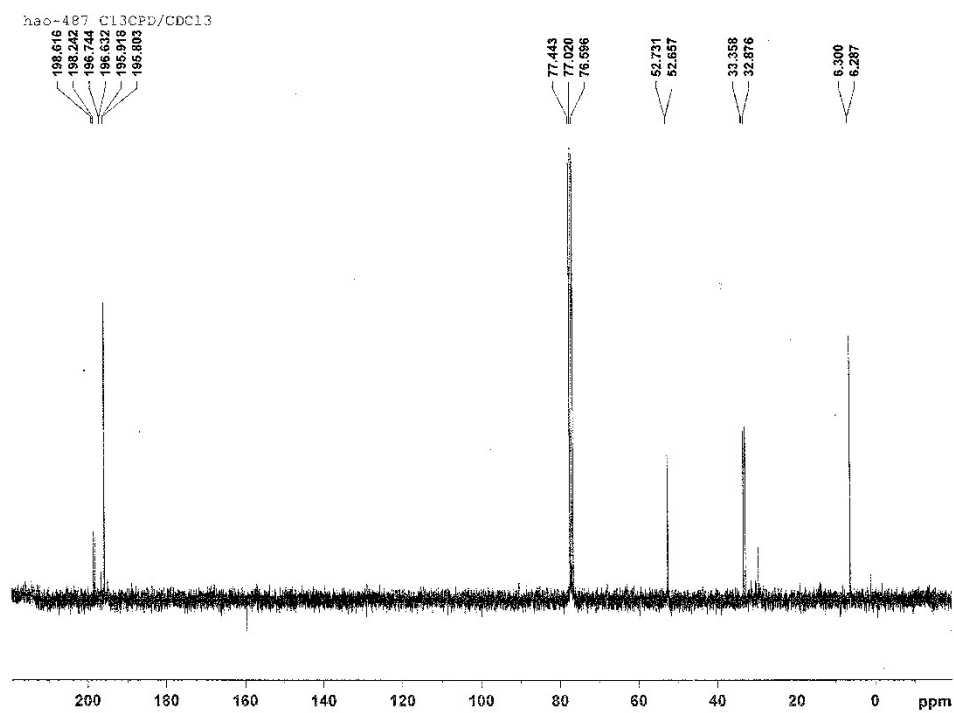

$^{13}\text{C}\{^1\text{H}\}$  NMR of Compound 14

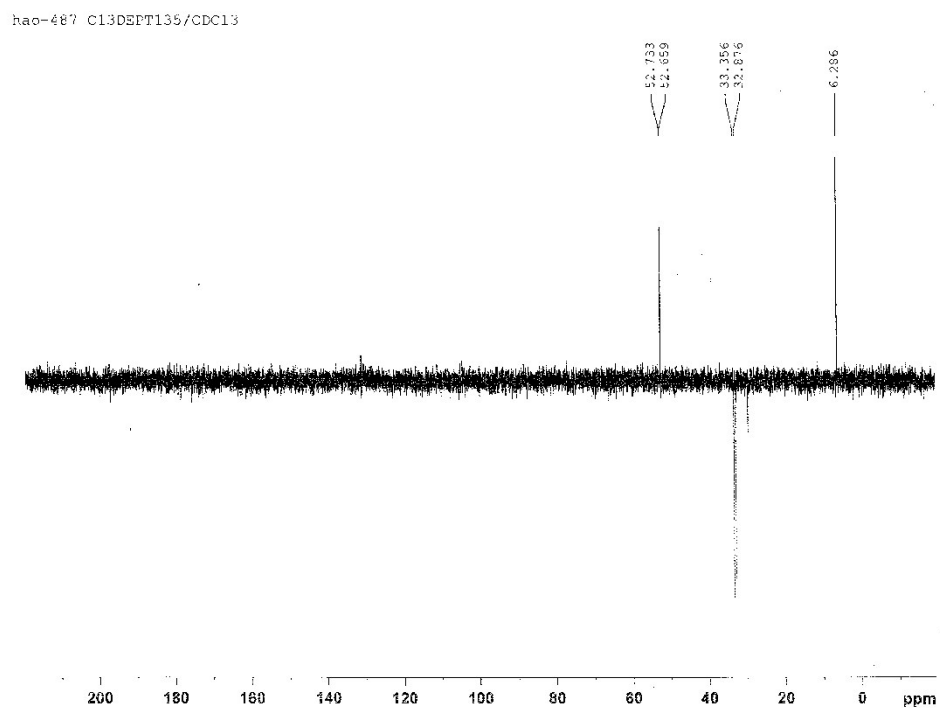

Dept135 NMR of Compound 14



hao-zhang92 P31CPD/CDC13

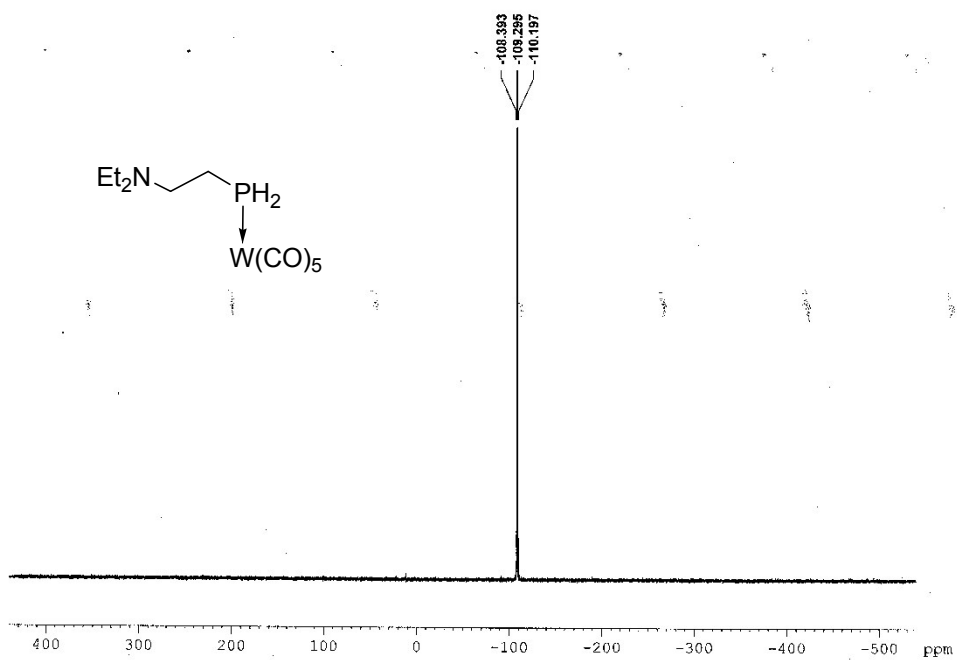

$^{31}\text{P}$  NMR of Compound 15

hao-zhang92 P31/CDC13

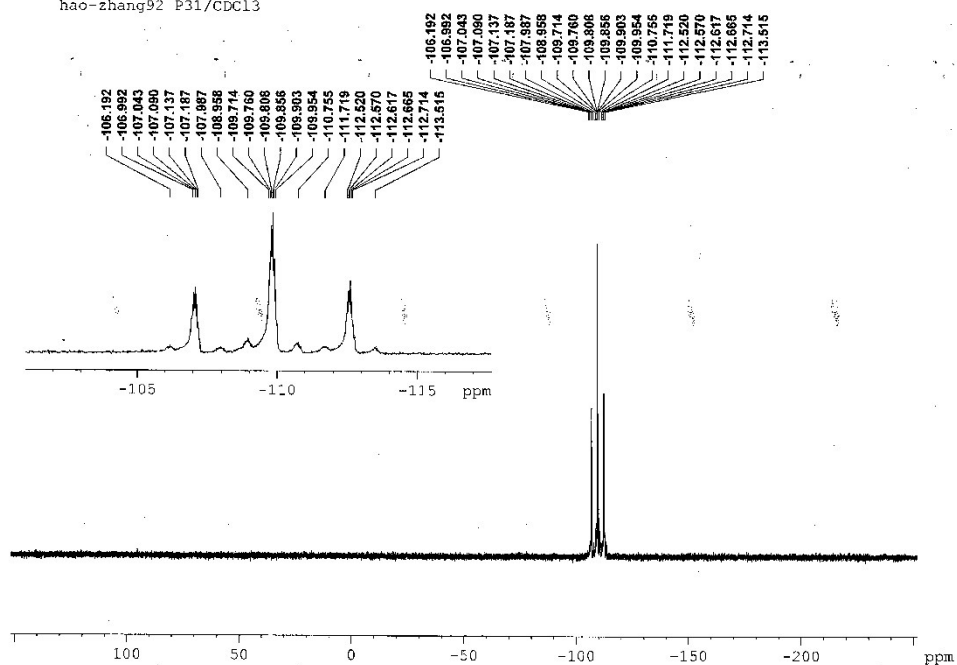

$^{31}\text{P}$  NMR of Compound 15

hao-zhang92 ptoton/CDCl3

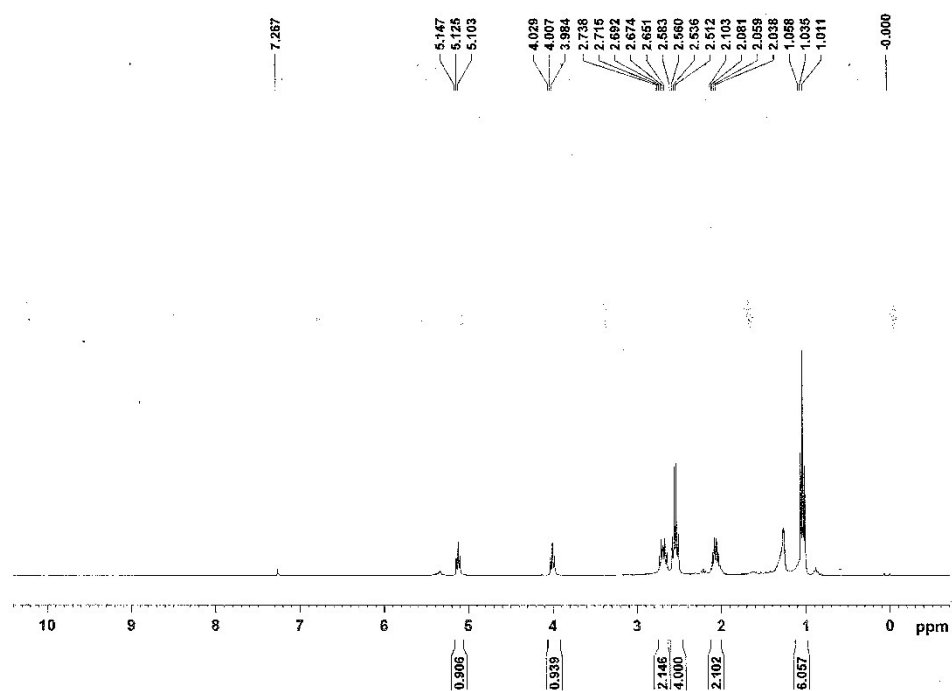

<sup>1</sup>H NMR of Compound 15

hao-zhang92 C13CPD/CDCl3

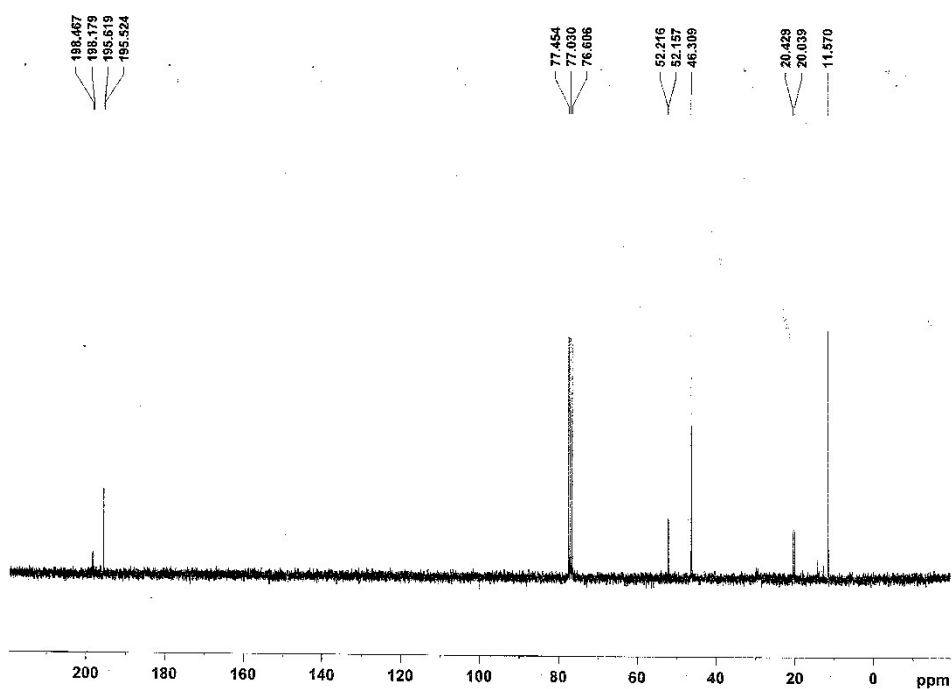

<sup>13</sup>C{<sup>1</sup>H} NMR of Compound 15

hao-zhang92 C13sept135/CDCl3

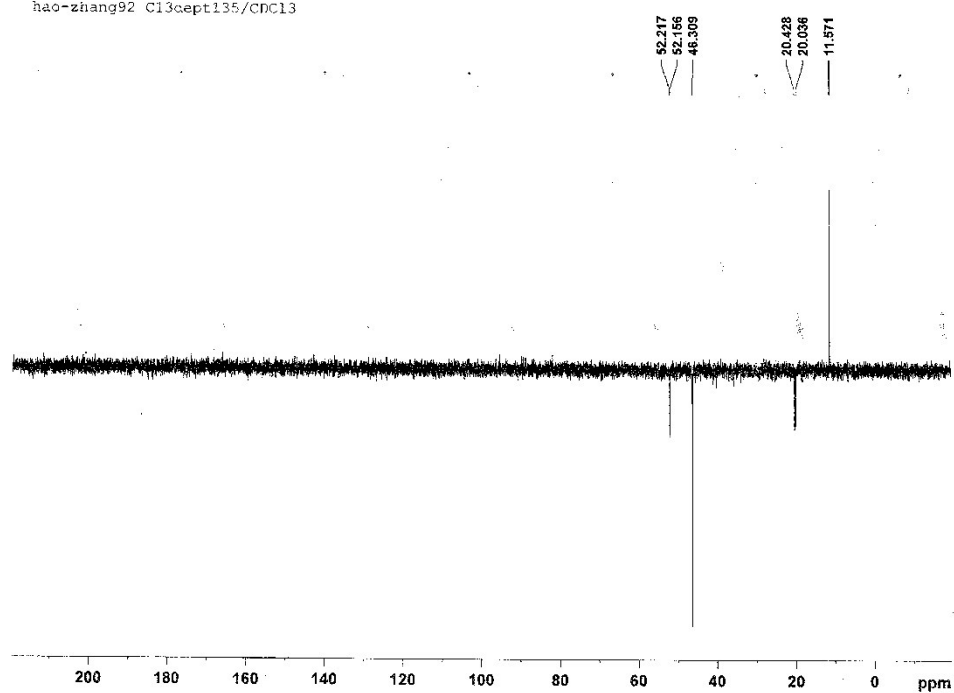

Dept135 NMR of Compound 15
